# Supplementary material for: Association between initiation of fluoroquinolones and hospital admission or emergency department visit for suicidality: population based cohort study
Source: PubMed Central journal article supplement — BMJ. 2022 Oct 4;379:e069931. doi: 10.1136/bmj-2021-069931 (PMC9530980; doi:10.1136/bmj-2021-069931), 2022-10-04
Supplement: wanj069931.ww.pdf [file wanj069931.ww.pdf]

## Supplemental Materials

Table 1. Definition of Inclusion Criteria for Pneumonia and Urinary Tract Infection

Table 2. Definition of Exclusion Criteria

Table 3. Definition of Covariates

Table 4. Baseline Characteristics Before and After Propensity Score Matching in the Pneumonia Cohort

Table 5. Baseline Characteristics Before and After Propensity Score Matching in the Urinary Tract Infection Cohort

Table 6. Duration and Generic Distribution of Index Drug dispensing in PS-matched Population

Table 7. Censoring Reasons in PS-matched Population, main analysis, 60-day follow-up

Figure. Cumulative Incidence for Suicidality – Primary Analysis

Table 8. Risk of Hospitalizations for Suicidal Ideation or Intentional Self-Harm Before Propensity Score Matching Following 60 Days after Antibiotic Initiation

Table 9. Risk of Hospitalizations for Suicidal Ideation or Intentional Self-Harm Before and After Propensity Score Matching Following 14 Days after Antibiotic Initiation

Table 10. Risk of Hospitalizations for Suicidal Ideation or Intentional Self-Harm Before and After Propensity Score Matching Following 30 Days after Antibiotic Initiation

Table 11. Risk of Hospitalizations for Suicidal Ideation or Intentional Self-Harm Before Propensity Score Matching Following 90 Days after Antibiotic Initiation

Table 12. Risk of Hospitalizations for Suicidal Ideation or Intentional Self-Harm Before and After Propensity Score Matching following 60 Days after Antibiotic Initiation, including Patients with Cancer, HIV, or History of suicidality

Table 13. Risk of Hospitalizations for Suicidal Ideation or Intentional Self-Harm Before and After Propensity Score Matching following 60 Days after Antibiotic Initiation with Restricted Outcome Definition

Table 14. Incidence Rates and Hazard Ratios of Subgroup Analyses after Propensity Score Matching following 60 Days after Antibiotic Initiation

**Table 1. Definition of Inclusion Criteria for Pneumonia and Urinary Tract Infection**

| <b>Inclusion criteria</b>                                                | <b>Definition</b>                                                                                                                                                                                                                                                                                                                                                                                                    |
|--------------------------------------------------------------------------|----------------------------------------------------------------------------------------------------------------------------------------------------------------------------------------------------------------------------------------------------------------------------------------------------------------------------------------------------------------------------------------------------------------------|
| Pneumonia in the 3 days prior to and including index date                | ICD-9 Dx Codes:<br>{“480.0”, “480.1”, “480.2”, “480.3”, “480.8”, “480.9”, “481”, “482.0”, “482.1”, “482.2”, “482.3”, “482.30”, “482.31”, “482.32”, “482.39”, “482.4”, “482.40”, “482.41”, “482.42”, “482.49”, “482.8”, “482.81”, “482.82”, “482.83”, “482.84”, “482.89”, “482.9”, “483.0”, “483.1”, “483.8”, “484.1”, “484.3”, “484.5”, “484.6”, “484.7”, “484.8”, “485”, “486”, “487.0”, “507.0”, “507.1”, “507.8”} |
| Urinary tract infections in the 3 days prior to and including index date | ICD-9 Dx Codes:<br>{“590.0”, “590.01”, “590.1”, “590.10”, “595.0”, “595.1”, “595.2”, “595.3”, “595.4”, “595.8”, “595.81”, “595.82”, “595.89”, “595.9”, “599.0”}                                                                                                                                                                                                                                                      |

**Table 2. Definition of Exclusion Criteria**

| Exclusion Criteria                    | Definition                                                                                                                                                                                                                                                                                                                                                                                                                                                                                                                                                                                                                                                                                                                                                                                                                                                                                                                                                                                                                                                                                                                                                                                                                                                                                                                                                                                                                                                                                                                                                                                                                                                                                                                                                                                                                                                                                                                                                                                                                                                                                                                                                                                                                                                                                                                                                                                                                                                                                                                                                                                                                                                                                                                                                                                                                                                                                                                                                                                                                    |
|---------------------------------------|-------------------------------------------------------------------------------------------------------------------------------------------------------------------------------------------------------------------------------------------------------------------------------------------------------------------------------------------------------------------------------------------------------------------------------------------------------------------------------------------------------------------------------------------------------------------------------------------------------------------------------------------------------------------------------------------------------------------------------------------------------------------------------------------------------------------------------------------------------------------------------------------------------------------------------------------------------------------------------------------------------------------------------------------------------------------------------------------------------------------------------------------------------------------------------------------------------------------------------------------------------------------------------------------------------------------------------------------------------------------------------------------------------------------------------------------------------------------------------------------------------------------------------------------------------------------------------------------------------------------------------------------------------------------------------------------------------------------------------------------------------------------------------------------------------------------------------------------------------------------------------------------------------------------------------------------------------------------------------------------------------------------------------------------------------------------------------------------------------------------------------------------------------------------------------------------------------------------------------------------------------------------------------------------------------------------------------------------------------------------------------------------------------------------------------------------------------------------------------------------------------------------------------------------------------------------------------------------------------------------------------------------------------------------------------------------------------------------------------------------------------------------------------------------------------------------------------------------------------------------------------------------------------------------------------------------------------------------------------------------------------------------------------|
| Prior history of self-harm behaviours | ICD-9 E-codes:<br>{ "E950", "E950.0", "E950.1", "E950.2", "E950.3", "E950.4", "E950.5", "E950.6", "E950.7", "E950.8", "E950.9", "E951", "E951.0", "E951.1", "E951.8", "E952", "E952.0", "E952.1", "E952.8", "E952.9", "E953", "E953.0", "E953.1", "E953.8", "E953.9", "E954", "E955", "E955.0", "E955.1", "E955.2", "E955.3", "E955.4", "E955.5", "E955.6", "E955.7", "E955.9", "E956", "E957", "E957.0", "E957.1", "E957.2", "E957.9", "E958", "E958.0", "E958.1", "E958.2", "E958.3", "E958.4", "E958.5", "E958.6", "E958.7", "E958.8", "E958.9", "E959" }                                                                                                                                                                                                                                                                                                                                                                                                                                                                                                                                                                                                                                                                                                                                                                                                                                                                                                                                                                                                                                                                                                                                                                                                                                                                                                                                                                                                                                                                                                                                                                                                                                                                                                                                                                                                                                                                                                                                                                                                                                                                                                                                                                                                                                                                                                                                                                                                                                                                  |
| HIV                                   | ICD-9 Dx codes:<br>{ "042", "079.53", "V08" }<br><br>Drugs:<br>{ "ABACAVIR SULFATE", "ABACAVIR SULFATE/DOLUTEGRAVIR SODIUM/LAMIVUDINE", "ABACAVIR SULFATE/LAMIVUDINE", "AMPRENAVIR/VITAMIN E", "AMPRENAVIR/VITAMIN E/PROPYLENE GLYCOL", "ATAZANAVIR SULFATE", "ATAZANAVIR SULFATE/COBICISTAT", "BICTEGRAVIR SODIUM/EMTRICITABINE/TENOFOVIR ALAFENAMIDE FUMAR", "DARUNAVIR ETH/COBICISTAT/EMTRICITABINE/TENOFOVIR ALAFENAMIDE", "DARUNAVIR ETHANOLATE", "DARUNAVIR ETHANOLATE/COBICISTAT", "DELAVIRDINE MESYLATE", "DIDANOSINE", "DIDANOSINE/CALCIUM CARBONATE/MAGNESIUM", "DIDANOSINE/SODIUM CITRATE", "EFAVIRENZ", "EFAVIRENZ/EMTRICITABINE/TENOFOVIR DISOPROXIL FUMARATE", "EFAVIRENZ/LAMIVUDINE/TENOFOVIR DISOPROXIL FUMARATE", "ELVITEGRAVIR/COBICISTAT/EMTRICITABINE/TENOFOVIR ALAFENAMIDE", "ELVITEGRAVIR/COBICISTAT/EMTRICITABINE/TENOFOVIR DISOPROXIL", "EMTRICITABINE", "EMTRICITABINE/TENOFOVIR ALAFENAMIDE FUMARATE", "EMTRICITABINE/TENOFOVIR DISOPROXIL FUMARATE", "ENFUVRTIDE", "ETRAVIRINE", "FOSAMPRENAVIR CALCIUM", "INDINAVIR SULFATE", "DOLUTEGRAVIR SODIUM/RILPIVIRINE HCL", "EMTRICITABINE/RILPIVIRINE HCL/TENOFOVIR ALAFENAMIDE FUMARATE", "EMTRICITABINE/RILPIVIRINE HCL/TENOFOVIR DISOPROXIL FUMARATE", "LOPINAVIR/RITONAVIR", "MARAVIROC", "NELFINAVIR MESYLATE", "NEVIRAPINE", "OMBITASVIR/PARITAPREVIR/RITONAVIR", "OMBITASVIR/PARITAPREVIR/RITONAVIR SODIUM", "RALTEGRAVIR POTASSIUM", "RILPIVIRINE HCL", "RITONAVIR", "ABACAVIR SULFATE/LAMIVUDINE/ZIDOVUDINE", "LAMIVUDINE/ZIDOVUDINE", "SAQUINAVIR", "SAQUINAVIR MESYLATE", "STAVUDINE", "TIPRANAVIR", "TIPRANAVIR/VITAMIN E TPGS", "ZALCITABINE", "ZIDOVUDINE" }                                                                                                                                                                                                                                                                                                                                                                                                                                                                                                                                                                                                                                                                                                                                                                                                                                                                                                                                                                                                                                                                                                                                                                                                                                                                                                                                                                              |
| Cancer                                | ICD-9 Dx codes:<br>{ "140", "140.0", "140.1", "140.3", "140.4", "140.5", "140.6", "140.8", "140.9", "141", "141.0", "141.1", "141.2", "141.3", "141.4", "141.5", "141.6", "141.8", "141.9", "142", "142.0", "142.1", "142.2", "142.8", "142.9", "143", "143.0", "143.1", "143.8", "143.9", "144", "144.0", "144.1", "144.8", "144.9", "145", "145.0", "145.1", "145.2", "145.3", "145.4", "145.5", "145.6", "145.8", "145.9", "146", "146.0", "146.1", "146.2", "146.3", "146.4", "146.5", "146.6", "146.7", "146.8", "146.9", "147", "147.0", "147.1", "147.2", "147.3", "147.8", "147.9", "148", "148.0", "148.1", "148.2", "148.3", "148.8", "148.9", "149", "149.0", "149.1", "149.8", "149.9", "150", "150.0", "150.1", "150.2", "150.3", "150.4", "150.5", "150.8", "150.9", "151", "151.0", "151.1", "151.2", "151.3", "151.4", "151.5", "151.6", "151.8", "151.9", "152", "152.0", "152.1", "152.2", "152.3", "152.8", "152.9", "153", "153.0", "153.1", "153.2", "153.3", "153.4", "153.5", "153.6", "153.7", "153.8", "153.9", "154", "154.0", "154.1", "154.2", "154.3", "154.8", "155", "155.0", "155.1", "155.2", "156", "156.0", "156.1", "156.2", "156.8", "156.9", "157", "157.0", "157.1", "157.2", "157.3", "157.4", "157.8", "157.9", "158", "158.0", "158.8", "158.9", "159", "159.0", "159.1", "159.8", "159.9", "160", "160.0", "160.1", "160.2", "160.3", "160.4", "160.5", "160.8", "160.9", "161", "161.0", "161.1", "161.2", "161.3", "161.8", "161.9", "162", "162.0", "162.2", "162.3", "162.4", "162.5", "162.8", "162.9", "163", "163.0", "163.1", "163.8", "163.9", "164", "164.0", "164.1", "164.2", "164.3", "164.8", "164.9", "165", "165.0", "165.8", "165.9", "170", "170.0", "170.1", "170.2", "170.3", "170.4", "170.5", "170.6", "170.7", "170.8", "170.9", "171", "171.0", "171.2", "171.3", "171.4", "171.5", "171.6", "171.7", "171.8", "171.9", "172", "172.0", "172.1", "172.2", "172.3", "172.4", "172.5", "172.6", "172.7", "172.8", "172.9", "173", "173.0", "173.00", "173.01", "173.02", "173.09", "173.1", "173.10", "173.11", "173.12", "173.19", "173.2", "173.20", "173.21", "173.22", "173.29", "173.3", "173.30", "173.31", "173.32", "173.39", "173.4", "173.40", "173.41", "173.42", "173.49", "173.5", "173.51", "173.52", "173.59", "173.6", "173.60", "173.61", "173.62", "173.69", "173.7", "173.70", "173.71", "173.72", "173.79", "173.8", "173.80", "173.81", "173.82", "173.89", "173.9", "173.90", "173.91", "173.92", "173.99", "174", "174.0", "174.1", "174.2", "174.3", "174.4", "174.5", "174.6", "174.8", "174.9", "175", "175.0", "175.9", "176", "176.0", "176.1", "176.2", "176.3", "176.4", "176.5", "176.8", "176.9", "179", "180", "180.0", "180.1", "180.8", "180.9", "181", "182", "182.0", "182.1", "182.8", "183", "183.0", "183.2", "183.3", "183.4", "183.5", "183.8", "183.9", "184", "184.0", "184.1", "184.2", "184.3", "184.4", "184.8", "184.9", "185", "186", "186.0", "186.9", "187", "187.1", "187.2", "187.3", "187.4", "187.5", |

|                                                                                                                                                                                                                                                                                                                                                                                                                                                                                                                                                                                                                                                                                                                                                                                                                                                                                                                                                                                                                                                                                                                                                                                                                                                                                                                                                                                                                                                                                                                                                                                                                                                                                                                                                                                                                                                                                                                                                                                                                                                                                                                                                                                                                                                                                                                                                                                                                                                                                                                                                                                                                                                                                                                                                                                                                                                                                                                                                                                                                                                                                                                                                                                                                                                                                                                                                                                                                                                                                                                                                                                                                                                                                                                                                                                                                                                                                                                                                                                                                                                                                                                                                                                                                                                                                                                                                                                                                                                                                                                                                                                                                                                                                                                                                                                                                                                                                                                                                                                                                                                                                                                                                                                                                                                                                                                                                                                                                                                                                                                                                                                                                                                                                                                                                                                                                                                                                                                                                                                                                                                                                                                                                                                                                                                                                                                                                     |
|-----------------------------------------------------------------------------------------------------------------------------------------------------------------------------------------------------------------------------------------------------------------------------------------------------------------------------------------------------------------------------------------------------------------------------------------------------------------------------------------------------------------------------------------------------------------------------------------------------------------------------------------------------------------------------------------------------------------------------------------------------------------------------------------------------------------------------------------------------------------------------------------------------------------------------------------------------------------------------------------------------------------------------------------------------------------------------------------------------------------------------------------------------------------------------------------------------------------------------------------------------------------------------------------------------------------------------------------------------------------------------------------------------------------------------------------------------------------------------------------------------------------------------------------------------------------------------------------------------------------------------------------------------------------------------------------------------------------------------------------------------------------------------------------------------------------------------------------------------------------------------------------------------------------------------------------------------------------------------------------------------------------------------------------------------------------------------------------------------------------------------------------------------------------------------------------------------------------------------------------------------------------------------------------------------------------------------------------------------------------------------------------------------------------------------------------------------------------------------------------------------------------------------------------------------------------------------------------------------------------------------------------------------------------------------------------------------------------------------------------------------------------------------------------------------------------------------------------------------------------------------------------------------------------------------------------------------------------------------------------------------------------------------------------------------------------------------------------------------------------------------------------------------------------------------------------------------------------------------------------------------------------------------------------------------------------------------------------------------------------------------------------------------------------------------------------------------------------------------------------------------------------------------------------------------------------------------------------------------------------------------------------------------------------------------------------------------------------------------------------------------------------------------------------------------------------------------------------------------------------------------------------------------------------------------------------------------------------------------------------------------------------------------------------------------------------------------------------------------------------------------------------------------------------------------------------------------------------------------------------------------------------------------------------------------------------------------------------------------------------------------------------------------------------------------------------------------------------------------------------------------------------------------------------------------------------------------------------------------------------------------------------------------------------------------------------------------------------------------------------------------------------------------------------------------------------------------------------------------------------------------------------------------------------------------------------------------------------------------------------------------------------------------------------------------------------------------------------------------------------------------------------------------------------------------------------------------------------------------------------------------------------------------------------------------------------------------------------------------------------------------------------------------------------------------------------------------------------------------------------------------------------------------------------------------------------------------------------------------------------------------------------------------------------------------------------------------------------------------------------------------------------------------------------------------------------------------------------------------------------------------------------------------------------------------------------------------------------------------------------------------------------------------------------------------------------------------------------------------------------------------------------------------------------------------------------------------------------------------------------------------------------------------------------------------------------------------------------------------|
| <p> "187.6", "187.7", "187.8", "187.9", "188", "188.0", "188.1", "188.2", "188.3", "188.4", "188.5", "188.6",<br/> "188.7", "188.8", "188.9", "189", "189.0", "189.1", "189.2", "189.3", "189.4", "189.8", "189.9", "190",<br/> "190.0", "190.1", "190.2", "190.3", "190.4", "190.5", "190.6", "190.7", "190.8", "190.9", "191", "191.0",<br/> "191.1", "191.2", "191.3", "191.4", "191.5", "191.6", "191.7", "191.8", "191.9", "192", "192.0", "192.1",<br/> "192.2", "192.3", "192.8", "192.9", "193", "194", "194.0", "194.1", "194.3", "194.4", "194.5", "194.6",<br/> "194.8", "194.9", "195", "195.0", "195.1", "195.2", "195.3", "195.4", "195.5", "195.8", "196", "196.0",<br/> "196.1", "196.2", "196.3", "196.5", "196.6", "196.8", "196.9", "197", "197.0", "197.1", "197.2", "197.3",<br/> "197.4", "197.5", "197.6", "197.7", "197.8", "198", "198.0", "198.1", "198.2", "198.3", "198.4", "198.5",<br/> "198.6", "198.7", "198.8", "198.81", "198.82", "198.89", "199", "199.0", "199.1", "199.2", "200",<br/> "200.0", "200.00", "200.01", "200.02", "200.03", "200.04", "200.05", "200.06", "200.07", "200.08",<br/> "200.1", "200.10", "200.11", "200.12", "200.13", "200.14", "200.15", "200.16", "200.17", "200.18",<br/> "200.2", "200.20", "200.21", "200.22", "200.23", "200.24", "200.25", "200.27", "200.28",<br/> "200.3", "200.30", "200.31", "200.32", "200.33", "200.34", "200.35", "200.36", "200.37", "200.38",<br/> "200.4", "200.40", "200.41", "200.42", "200.43", "200.44", "200.45", "200.46", "200.47", "200.48",<br/> "200.5", "200.50", "200.51", "200.52", "200.53", "200.54", "200.55", "200.56", "200.57", "200.58",<br/> "200.6", "200.60", "200.61", "200.62", "200.63", "200.64", "200.65", "200.66", "200.67", "200.68",<br/> "200.7", "200.70", "200.71", "200.72", "200.73", "200.74", "200.75", "200.76", "200.77", "200.78",<br/> "200.8", "200.80", "200.81", "200.82", "200.83", "200.84", "200.85", "200.86", "200.87", "200.88",<br/> "201", "201.0", "201.00", "201.01", "201.02", "201.03", "201.04", "201.05", "201.06", "201.07",<br/> "201.08", "201.1", "201.10", "201.11", "201.12", "201.13", "201.14", "201.15", "201.16", "201.17",<br/> "201.18", "201.2", "201.20", "201.21", "201.22", "201.23", "201.24", "201.25", "201.26", "201.27",<br/> "201.28", "201.4", "201.40", "201.41", "201.42", "201.43", "201.44", "201.45", "201.46", "201.47",<br/> "201.48", "201.5", "201.50", "201.51", "201.52", "201.53", "201.54", "201.55", "201.56", "201.57",<br/> "201.58", "201.6", "201.60", "201.61", "201.62", "201.63", "201.64", "201.65", "201.66", "201.67",<br/> "201.68", "201.7", "201.70", "201.71", "201.72", "201.73", "201.74", "201.75", "201.76", "201.77",<br/> "201.78", "201.9", "201.90", "201.91", "201.92", "201.93", "201.94", "201.95", "201.96", "201.97",<br/> "201.98", "202", "202.0", "202.00", "202.01", "202.02", "202.03", "202.04", "202.05", "202.06",<br/> "202.07", "202.08", "202.1", "202.10", "202.11", "202.12", "202.13", "202.14", "202.15", "202.16",<br/> "202.17", "202.18", "202.2", "202.20", "202.21", "202.22", "202.23", "202.24", "202.25", "202.26",<br/> "202.27", "202.28", "202.3", "202.30", "202.31", "202.32", "202.33", "202.34", "202.35", "202.36",<br/> "202.37", "202.38", "202.4", "202.40", "202.41", "202.42", "202.43", "202.44", "202.45", "202.46",<br/> "202.47", "202.48", "202.5", "202.50", "202.51", "202.52", "202.53", "202.54", "202.55", "202.56",<br/> "202.57", "202.58", "202.6", "202.60", "202.61", "202.62", "202.63", "202.64", "202.65", "202.66",<br/> "202.67", "202.68", "202.7", "202.70", "202.71", "202.72", "202.73", "202.74", "202.75", "202.76",<br/> "202.77", "202.78", "202.8", "202.80", "202.81", "202.82", "202.83", "202.84", "202.85", "202.86",<br/> "202.87", "202.88", "202.9", "202.90", "202.91", "202.92", "202.93", "202.94", "202.95", "202.96",<br/> "202.97", "202.98", "203", "203.0", "203.00", "203.01", "203.02", "203.1", "203.10", "203.11",<br/> "203.12", "203.8", "203.80", "203.81", "203.82", "204", "204.0", "204.00", "204.01", "204.02", "204.1",<br/> "204.10", "204.11", "204.12", "204.2", "204.20", "204.21", "204.22", "204.8", "204.80", "204.81",<br/> "204.82", "204.9", "204.90", "204.91", "204.92", "205", "205.0", "205.00", "205.01", "205.02", "205.1",<br/> "205.10", "205.11", "205.12", "205.2", "205.20", "205.21", "205.22", "205.3", "205.30", "205.31",<br/> "205.32", "205.8", "205.80", "205.81", "205.82", "205.9", "205.90", "205.91", "205.92", "206", "206.0",<br/> "206.00", "206.01", "206.02", "206.1", "206.10", "206.11", "206.12", "206.2", "206.20", "206.21",<br/> "206.22", "206.8", "206.80", "206.81", "206.82", "206.9", "206.90", "206.91", "206.92", "207", "207.0",<br/> "207.00", "207.01", "207.02", "207.1", "207.10", "207.11", "207.12", "207.2", "207.20", "207.21",<br/> "207.22", "207.8", "207.80", "207.81", "207.82", "208", "208.0", "208.00", "208.01", "208.02", "208.1",<br/> "208.10", "208.11", "208.12", "208.2", "208.20", "208.21", "208.22", "208.8", "208.80", "208.81",<br/> "208.82", "208.9", "208.90", "208.91", "208.92", "230", "230.0", "230.1", "230.2", "230.3", "230.4",<br/> "230.5", "230.6", "230.7", "230.8", "230.9", "231", "231.0", "231.1", "231.2", "231.8", "231.9", "232",<br/> "232.0", "232.1", "232.2", "232.3", "232.4", "232.5", "232.6", "232.7", "232.8", "232.9", "233", "233.0",<br/> "233.1", "233.2", "233.3", "233.30", "233.31", "233.32", "233.39", "233.4", "233.5", "233.6", "233.7",<br/> "233.9", "234", "234.0", "234.8", "234.9", "235", "235.0", "235.1", "235.2", "235.3", "235.4", "235.5",<br/> "235.6", "235.7", "235.8", "235.9", "236", "236.0", "236.1", "236.2", "236.3", "236.4", "236.5", "236.6",<br/> "236.7", "236.9", "236.90", "236.91", "236.99", "237", "237.0", "237.1", "237.2", "237.3", "237.4",<br/> "237.5", "237.6", "237.7", "237.70", "237.71", "237.72", "237.73", "237.79", "237.9", "238", "238.0",<br/> "238.1", "238.2", "238.3", "238.4", "238.5", "238.6", "238.7", "238.71", "238.72", "238.73", "238.74",<br/> "238.75", "238.76", "238.77", "238.79", "238.8", "238.9", "239", "239.0", "239.1", "239.2", "239.3",<br/> "239.4", "239.5", "239.6", "239.7", "239.8", "239.81", "239.89", "239.9"} </p> |
|-----------------------------------------------------------------------------------------------------------------------------------------------------------------------------------------------------------------------------------------------------------------------------------------------------------------------------------------------------------------------------------------------------------------------------------------------------------------------------------------------------------------------------------------------------------------------------------------------------------------------------------------------------------------------------------------------------------------------------------------------------------------------------------------------------------------------------------------------------------------------------------------------------------------------------------------------------------------------------------------------------------------------------------------------------------------------------------------------------------------------------------------------------------------------------------------------------------------------------------------------------------------------------------------------------------------------------------------------------------------------------------------------------------------------------------------------------------------------------------------------------------------------------------------------------------------------------------------------------------------------------------------------------------------------------------------------------------------------------------------------------------------------------------------------------------------------------------------------------------------------------------------------------------------------------------------------------------------------------------------------------------------------------------------------------------------------------------------------------------------------------------------------------------------------------------------------------------------------------------------------------------------------------------------------------------------------------------------------------------------------------------------------------------------------------------------------------------------------------------------------------------------------------------------------------------------------------------------------------------------------------------------------------------------------------------------------------------------------------------------------------------------------------------------------------------------------------------------------------------------------------------------------------------------------------------------------------------------------------------------------------------------------------------------------------------------------------------------------------------------------------------------------------------------------------------------------------------------------------------------------------------------------------------------------------------------------------------------------------------------------------------------------------------------------------------------------------------------------------------------------------------------------------------------------------------------------------------------------------------------------------------------------------------------------------------------------------------------------------------------------------------------------------------------------------------------------------------------------------------------------------------------------------------------------------------------------------------------------------------------------------------------------------------------------------------------------------------------------------------------------------------------------------------------------------------------------------------------------------------------------------------------------------------------------------------------------------------------------------------------------------------------------------------------------------------------------------------------------------------------------------------------------------------------------------------------------------------------------------------------------------------------------------------------------------------------------------------------------------------------------------------------------------------------------------------------------------------------------------------------------------------------------------------------------------------------------------------------------------------------------------------------------------------------------------------------------------------------------------------------------------------------------------------------------------------------------------------------------------------------------------------------------------------------------------------------------------------------------------------------------------------------------------------------------------------------------------------------------------------------------------------------------------------------------------------------------------------------------------------------------------------------------------------------------------------------------------------------------------------------------------------------------------------------------------------------------------------------------------------------------------------------------------------------------------------------------------------------------------------------------------------------------------------------------------------------------------------------------------------------------------------------------------------------------------------------------------------------------------------------------------------------------------------------------------------------------------------------------------|

Abbreviations: HIV, human immunodeficiency virus.

**Table 3. Definition of Covariates**

| Covariates                                | Definitions                                                                                                                                                                                                                                                                                                                                                                                                                                                                                                                                                                                                                                                                                                                                                                                                                                                                                                                                                                                                                                                                                                                                                                                                                                                                                                                                                                                                                                                                                                                                                                                                                                                                                     |
|-------------------------------------------|-------------------------------------------------------------------------------------------------------------------------------------------------------------------------------------------------------------------------------------------------------------------------------------------------------------------------------------------------------------------------------------------------------------------------------------------------------------------------------------------------------------------------------------------------------------------------------------------------------------------------------------------------------------------------------------------------------------------------------------------------------------------------------------------------------------------------------------------------------------------------------------------------------------------------------------------------------------------------------------------------------------------------------------------------------------------------------------------------------------------------------------------------------------------------------------------------------------------------------------------------------------------------------------------------------------------------------------------------------------------------------------------------------------------------------------------------------------------------------------------------------------------------------------------------------------------------------------------------------------------------------------------------------------------------------------------------|
| <b>Mental disorders</b>                   |                                                                                                                                                                                                                                                                                                                                                                                                                                                                                                                                                                                                                                                                                                                                                                                                                                                                                                                                                                                                                                                                                                                                                                                                                                                                                                                                                                                                                                                                                                                                                                                                                                                                                                 |
| Anxiety disorder                          | ICD-9 Dx codes:<br>{“300.0”, “300.00”, “300.01”, “300.02”, “300.09”, “300.2”, “300.20”, “300.21”, “300.22”, “300.23”, “300.29”, “300.3” }                                                                                                                                                                                                                                                                                                                                                                                                                                                                                                                                                                                                                                                                                                                                                                                                                                                                                                                                                                                                                                                                                                                                                                                                                                                                                                                                                                                                                                                                                                                                                       |
| Depression                                | ICD-9 Dx codes:<br>{“293.83”, “296.90”, “309.28”, “311”, “296.2”, “296.20”, “296.21”, “296.22”, “296.23”, “296.24”, “296.25”, “296.26”, “296.3”, “296.30”, “296.31”, “296.32”, “296.33”, “296.34”, “296.35”, “296.36”, “298.0”, “300.4”, “309.0”, “309.1” }                                                                                                                                                                                                                                                                                                                                                                                                                                                                                                                                                                                                                                                                                                                                                                                                                                                                                                                                                                                                                                                                                                                                                                                                                                                                                                                                                                                                                                     |
| Sleep disorder                            | ICD-9 Dx codes:<br>{ “307.4”, “307.40”, “307.41”, “307.42”, “307.43”, “307.44”, “307.45”, “307.46”, “307.47”, “307.48”, “307.49”, “347.0”, “347.00”, “347.01”, “347.1”, “347.10”, “347.11”, “780.5”, “780.50”, “780.51”, “780.52”, “780.53”, “780.54”, “780.55”, “780.56”, “780.57”, “780.58”, “780.59” }                                                                                                                                                                                                                                                                                                                                                                                                                                                                                                                                                                                                                                                                                                                                                                                                                                                                                                                                                                                                                                                                                                                                                                                                                                                                                                                                                                                       |
| Psychotic disorders                       | ICD-9 Dx codes:<br>{ “290.8”, “290.9”, “295.0”, “295.00”, “295.01”, “295.02”, “295.03”, “295.04”, “295.05”, “295.1”, “295.10”, “295.11”, “295.12”, “295.13”, “295.14”, “295.15”, “295.2”, “295.20”, “295.21”, “295.22”, “295.23”, “295.24”, “295.25”, “295.3”, “295.30”, “295.31”, “295.32”, “295.33”, “295.34”, “295.35”, “295.4”, “295.40”, “295.41”, “295.42”, “295.43”, “295.44”, “295.45”, “295.5”, “295.50”, “295.51”, “295.52”, “295.53”, “295.54”, “295.55”, “295.6”, “295.60”, “295.61”, “295.62”, “295.63”, “295.64”, “295.65”, “295.7”, “295.70”, “295.71”, “295.72”, “295.73”, “295.74”, “295.75”, “295.8”, “295.80”, “295.81”, “295.82”, “295.83”, “295.84”, “295.85”, “295.9”, “295.90”, “295.91”, “295.92”, “295.93”, “295.94”, “295.95”, “297.0”, “297.1”, “297.2”, “297.3”, “297.8”, “297.9”, “298.1”, “298.2”, “298.3”, “298.4”, “298.8”, “298.9”, “299.0”, “299.00”, “299.01”, “299.1”, “299.10”, “299.11”, “299.8”, “299.80”, “299.81”, “299.9”, “299.90”, “299.91”, “780.1” }                                                                                                                                                                                                                                                                                                                                                                                                                                                                                                                                                                                                                                                                                              |
| Mania                                     | ICD-9 Dx codes:<br>{ “296.0”, “296.00”, “296.01”, “296.02”, “296.03”, “296.04”, “296.05”, “296.06”, “296.1”, “296.10”, “296.11”, “296.12”, “296.13”, “296.14”, “296.15”, “296.16”, “296.4”, “296.40”, “296.41”, “296.42”, “296.43”, “296.44”, “296.45”, “296.46”, “296.5”, “296.50”, “296.51”, “296.52”, “296.53”, “296.54”, “296.55”, “296.56”, “296.6”, “296.60”, “296.61”, “296.62”, “296.63”, “296.64”, “296.65”, “296.66”, “296.7”, “296.8”, “296.80”, “296.81”, “296.82”, “296.89” }                                                                                                                                                                                                                                                                                                                                                                                                                                                                                                                                                                                                                                                                                                                                                                                                                                                                                                                                                                                                                                                                                                                                                                                                      |
| Attention-deficit/ hyperactivity disorder | ICD-9 Dx codes:<br>{ “312.0”, “312.00”, “312.01”, “312.02”, “312.03”, “312.1”, “312.10”, “312.11”, “312.12”, “312.13”, “312.2”, “312.20”, “312.21”, “312.22”, “312.23”, “312.3”, “312.30”, “312.31”, “312.32”, “312.33”, “312.34”, “312.35”, “312.39”, “312.4”, “312.8”, “312.81”, “312.82”, “312.89”, “312.9”, “314.0”, “314.00”, “314.01”, “314.1”, “314.2”, “314.8”, “314.9” }                                                                                                                                                                                                                                                                                                                                                                                                                                                                                                                                                                                                                                                                                                                                                                                                                                                                                                                                                                                                                                                                                                                                                                                                                                                                                                               |
| Delirium                                  | ICD-9 Dx codes:<br>{ “290.11”, “290.41”, “292.81”, “349.82”, “290.3”, “291.0”, “293.0”, “293.1”, “293.8”, “293.81”, “293.82”, “293.83”, “293.84”, “293.89”, “293.9”, “348.3”, “348.30”, “348.31”, “348.39” }                                                                                                                                                                                                                                                                                                                                                                                                                                                                                                                                                                                                                                                                                                                                                                                                                                                                                                                                                                                                                                                                                                                                                                                                                                                                                                                                                                                                                                                                                    |
| Dementia                                  | ICD-9 Dx codes:<br>{ “290.0”, “290.11”, “290.12”, “290.3”, “290.40”, “290.41”, “290.42”, “290.43”, “290.8”, “292.82”, “294.0”, “294.9”, “330.3”, “331.0”, “331.1”, “331.3”, “331.6”, “331.8”, “331.82”, “331.83”, “290.1”, “290.10”, “290.13”, “290.2”, “290.20”, “290.21”, “290.4”, “290.9”, “294.1”, “294.10”, “294.11”, “294.2”, “294.20”, “294.21”, “294.8”, “330.0”, “330.1”, “330.2”, “330.8”, “330.9”, “331.11”, “331.19”, “331.2”, “331.4”, “331.5”, “331.7”, “331.81”, “331.89”, “331.9” }                                                                                                                                                                                                                                                                                                                                                                                                                                                                                                                                                                                                                                                                                                                                                                                                                                                                                                                                                                                                                                                                                                                                                                                             |
| Substance Abuse                           | ICD-9 Dx codes:<br>{ “305.1”, “970.1”, “291.0”, “291.2”, “291.4”, “291.81”, “292.0”, “292.12”, “292.2”, “292.8”, “292.82”, “292.83”, “292.84”, “292.85”, “292.89”, “303.0”, “303.03”, “303.90”, “303.92”, “303.93”, “304.00”, “304.01”, “304.02”, “304.03”, “304.1”, “304.11”, “304.13”, “304.21”, “304.32”, “304.41”, “304.42”, “304.43”, “304.5”, “304.51”, “304.63”, “304.7”, “304.8”, “304.80”, “304.82”, “304.9”, “304.90”, “304.91”, “304.92”, “305.0”, “305.00”, “305.01”, “305.02”, “305.2”, “305.21”, “305.22”, “305.23”, “305.3”, “305.30”, “305.33”, “305.40”, “305.41”, “305.50”, “305.51”, “305.52”, “305.6”, “305.60”, “305.62”, “305.72”, “305.80”, “305.9”, “305.90”, “305.91”, “305.92”, “305.93”, “357.5”, “425.5”, “571.0”, “571.2”, “648.3”, “648.30”, “648.32”, “965.00”, “965.02”, “967.0”, “967.2”, “967.3”, “967.5”, “967.9”, “969.73”, “969.79”, “V11.3”, “291.1”, “291.3”, “291.5”, “291.8”, “291.82”, “291.89”, “291.9”, “292.1”, “292.11”, “292.81”, “292.9”, “303.00”, “303.01”, “303.02”, “303.9”, “303.91”, “304.0”, “304.10”, “304.12”, “304.2”, “304.20”, “304.22”, “304.23”, “304.3”, “304.30”, “304.31”, “304.33”, “304.4”, “304.40”, “304.50”, “304.52”, “304.53”, “304.6”, “304.60”, “304.61”, “304.62”, “304.70”, “304.71”, “304.72”, “304.73”, “304.81”, “304.83”, “304.93”, “305.03”, “305.20”, “305.31”, “305.32”, “305.4”, “305.42”, “305.43”, “305.5”, “305.53”, “305.61”, “305.63”, “305.7”, “305.70”, “305.71”, “305.73”, “305.8”, “305.81”, “305.82”, “305.83”, “571.1”, “571.3”, “648.31”, “648.33”, “648.34”, “965.0”, “965.01”, “965.09”, “967”, “967.1”, “967.4”, “967.6”, “967.8”, “969.4”, “969.5”, “969.6”, “969.72”, “970.81”, “E860.0” } |
| Personality disorders                     | ICD-9 Dx codes:<br>{“301.0”, “301.1”, “301.10”, “301.11”, “301.12”, “301.13”, “301.2”, “301.20”, “301.21”, “301.22”, “301.3”, “301.4”, “301.5”, “301.50”, “301.51”, “301.59”, “301.6”, “301.7”, “301.8”, “301.81”, “301.82”, “301.83”, “301.84”, “301.89”, “301.9” }                                                                                                                                                                                                                                                                                                                                                                                                                                                                                                                                                                                                                                                                                                                                                                                                                                                                                                                                                                                                                                                                                                                                                                                                                                                                                                                                                                                                                            |

|                                                                |                                                                                                                                                                                                                                                                                                                                                                                                                                                                                                                                                                                                                                                                                                                                                                                                                                                                                                                                                                                                                                                                                                                                                                                                                                                             |
|----------------------------------------------------------------|-------------------------------------------------------------------------------------------------------------------------------------------------------------------------------------------------------------------------------------------------------------------------------------------------------------------------------------------------------------------------------------------------------------------------------------------------------------------------------------------------------------------------------------------------------------------------------------------------------------------------------------------------------------------------------------------------------------------------------------------------------------------------------------------------------------------------------------------------------------------------------------------------------------------------------------------------------------------------------------------------------------------------------------------------------------------------------------------------------------------------------------------------------------------------------------------------------------------------------------------------------------|
| Adjustment reaction with disturbance other than depressed mood | ICD-9 Dx codes:<br>{“309.2”, “309.21”, “309.22”, “309.23”, “309.24”, “309.28”, “309.29”, “309.3”, “309.4”, “309.8”, “309.81”, “309.82”, “309.83”, “309.89”, “309.9”}                                                                                                                                                                                                                                                                                                                                                                                                                                                                                                                                                                                                                                                                                                                                                                                                                                                                                                                                                                                                                                                                                        |
| Other mental disorder                                          | ICD-9 Dx codes:<br>{ “300.5”, “300.7”, “300.6”, “300.1”, “300.10”, “300.11”, “300.12”, “300.13”, “300.14”, “300.15”, “300.16”, “300.19”, “300.8”, “300.81”, “300.82”, “300.89”, “302.0”, “302.1”, “302.2”, “302.3”, “302.4”, “302.5”, “302.50”, “302.51”, “302.52”, “302.53”, “302.6”, “302.7”, “302.70”, “302.71”, “302.72”, “302.73”, “302.74”, “302.75”, “302.76”, “302.79”, “302.8”, “302.81”, “302.82”, “302.83”, “302.84”, “302.85”, “302.89”, “302.9”, “306.0”, “306.1”, “306.2”, “306.3”, “306.4”, “306.5”, “306.50”, “306.51”, “306.52”, “306.53”, “306.59”, “306.6”, “306.7”, “306.8”, “306.9”, “307.0”, “307.1”, “307.2”, “307.20”, “307.21”, “307.22”, “307.23”, “307.3”, “307.5”, “307.50”, “307.51”, “307.52”, “307.53”, “307.54”, “307.59”, “307.6”, “307.7”, “307.8”, “307.80”, “307.81”, “307.89”, “307.9”, “308.0”, “308.1”, “308.2”, “308.3”, “308.4”, “308.9”, “310.0”, “310.1”, “310.2”, “310.8”, “310.81”, “310.89”, “310.9”, “313.0”, “313.1”, “313.2”, “313.21”, “313.22”, “313.23”, “313.3”, “313.8”, “313.81”, “313.82”, “313.83”, “313.89”, “313.9”, “315.0”, “315.00”, “315.01”, “315.02”, “315.09”, “315.1”, “315.2”, “315.3”, “315.31”, “315.32”, “315.34”, “315.35”, “315.39”, “315.4”, “315.5”, “315.8”, “315.9”, “300.9” } |
| <b>Neurological disorders</b>                                  |                                                                                                                                                                                                                                                                                                                                                                                                                                                                                                                                                                                                                                                                                                                                                                                                                                                                                                                                                                                                                                                                                                                                                                                                                                                             |
| Seizure /Epilepsy                                              | ICD-9 Dx codes:<br>{ “345”, “345.0”, “345.00”, “345.01”, “345.1”, “345.10”, “345.11”, “345.2”, “345.3”, “345.4”, “345.40”, “345.41”, “345.5”, “345.50”, “345.51”, “345.6”, “345.60”, “345.61”, “345.7”, “345.70”, “345.71”, “345.8”, “345.80”, “345.81”, “345.9”, “345.90”, “345.91”, “780.3”, “780.31”, “780.32”, “780.39”, “780.33” }                                                                                                                                                                                                                                                                                                                                                                                                                                                                                                                                                                                                                                                                                                                                                                                                                                                                                                                     |
| Peripheral neuropathy and neuropathic pain                     | ICD-9 Dx codes:<br>{“336.9”, “341.9”, “729.2”, “955.5”, “955.6”, “955.7”, “337.1”, “357.81”, “951.4”, “953.4”, “337.2”, “337.20”, “337.21”, “337.22”, “337.29”, “350.1”, “350.2”, “350.8”, “350.9”, “351.0”, “351.1”, “351.8”, “351.9”, “353.0”, “353.1”, “353.2”, “353.3”, “353.4”, “353.5”, “353.6”, “353.8”, “353.9”, “354.0”, “354.1”, “354.2”, “354.3”, “354.4”, “354.5”, “354.8”, “354.9”, “355.0”, “355.1”, “355.2”, “355.3”, “355.4”, “355.5”, “355.6”, “355.7”, “355.71”, “355.79”, “355.8”, “355.9”, “356.0”, “356.1”, “356.2”, “356.3”, “356.4”, “356.8”, “356.9”, “952.0”, “952.00”, “952.01”, “952.02”, “952.03”, “952.04”, “952.05”, “952.06”, “952.07”, “952.08”, “952.09”, “952.1”, “952.10”, “952.11”, “952.12”, “952.13”, “952.14”, “952.15”, “952.16”, “952.17”, “952.18”, “952.19”, “952.2”, “952.3”, “952.4”, “952.8”, “952.9”, “053.12”}                                                                                                                                                                                                                                                                                                                                                                                              |
| Migraine                                                       | ICD-9 Dx codes:<br>{ “346.0”, “346.00”, “346.01”, “346.02”, “346.03”, “346.1”, “346.10”, “346.11”, “346.12”, “346.13”, “346.2”, “346.20”, “346.21”, “346.22”, “346.23”, “346.3”, “346.30”, “346.31”, “346.32”, “346.33”, “346.4”, “346.40”, “346.41”, “346.42”, “346.43”, “346.5”, “346.50”, “346.51”, “346.52”, “346.53”, “346.6”, “346.60”, “346.61”, “346.62”, “346.63”, “346.7”, “346.70”, “346.71”, “346.72”, “346.73”, “346.8”, “346.80”, “346.81”, “346.82”, “346.83”, “346.9”, “346.90”, “346.91”, “346.92”, “346.93” }                                                                                                                                                                                                                                                                                                                                                                                                                                                                                                                                                                                                                                                                                                                             |
| Parkinson disease                                              | ICD-9 Dx codes:<br>{“332.0”, “332.1”, “332”}                                                                                                                                                                                                                                                                                                                                                                                                                                                                                                                                                                                                                                                                                                                                                                                                                                                                                                                                                                                                                                                                                                                                                                                                                |
| Multiple sclerosis                                             | ICD-9 Dx codes:<br>{“340”}<br><br>Drugs:<br>{“ALEMTUZUMAB”, “CLADRIBINE”, “DIMETHYL FUMARATE”, “DIROXIMEL FUMARATE”, “FINGOLIMOD HCL”, “GLATIRAMER ACETATE”, “INTERFERON BETA-1A”, “INTERFERON BETA-1A/ALBUMIN HUMAN”, “INTERFERON BETA-1B”, “MITOXANTRONE HCL”, “NATALIZUMAB”, “OCRELIZUMAB”, “OFATUMUMAB”, “PEGINTERFERON BETA-1A”, “SIPONIMOD”, “TERIFLUNOMIDE”}                                                                                                                                                                                                                                                                                                                                                                                                                                                                                                                                                                                                                                                                                                                                                                                                                                                                                         |
| <b>Other comorbidities</b>                                     |                                                                                                                                                                                                                                                                                                                                                                                                                                                                                                                                                                                                                                                                                                                                                                                                                                                                                                                                                                                                                                                                                                                                                                                                                                                             |
| Congestive heart failure                                       | ICD-9 Dx Codes:<br>{ “398.91”, “402.01”, “402.11”, “402.91”, “404.01”, “404.03”, “404.11”, “404.13”, “404.93”, “428.0”, “428.1”, “428.2”, “428.20”, “428.21”, “428.22”, “428.23”, “428.3”, “428.30”, “428.31”, “428.32”, “428.33”, “428.4”, “428.40”, “428.41”, “428.42”, “428.43”, “428.9”}                                                                                                                                                                                                                                                                                                                                                                                                                                                                                                                                                                                                                                                                                                                                                                                                                                                                                                                                                                |
| Ischemic heart disease                                         | ICD-9 Dx Codes:<br>{“410.0”, “410.00”, “410.01”, “410.02”, “410.1”, “410.10”, “410.11”, “410.12”, “410.2”, “410.20”, “410.21”, “410.22”, “410.3”, “410.30”, “410.31”, “410.32”, “410.4”, “410.40”, “410.41”, “410.42”, “410.5”, “410.50”, “410.51”, “410.52”, “410.6”, “410.60”, “410.61”, “410.62”, “410.7”, “410.70”, “410.71”, “410.72”, “410.8”, “410.80”, “410.81”, “410.82”, “410.9”, “410.90”, “410.91”, “410.92”, “411.0”, “411.1”, “411.8”, “411.81”, “411.89”, “412”, “413.0”, “413.1”, “413.9”, “414.0”, “414.00”, “414.01”, “414.02”, “414.03”, “414.04”, “414.05”, “414.06”, “414.07”, “414.1”, “414.10”, “414.11”, “414.12”, “414.19”, “414.2”, “414.3”, “414.4”, “414.8”, “414.9”}                                                                                                                                                                                                                                                                                                                                                                                                                                                                                                                                                           |
| Any stroke (ischemic, hemorrhagic)                             | ICD-9 Dx Codes:<br>{“430”, “431”, “433.0”, “433.2”, “433.20”, “433.3”, “433.90”, “434.0”, “434.10”, “434.90”, “434.91”, “436”, “433.00”, “433.01”, “433.1”, “433.10”, “433.11”, “433.21”, “433.30”, “433.31”, “433.8”, “433.80”, “433.81”, “433.9”, “433.91”, “434.00”, “434.01”, “434.1”, “434.11”, “434.9”}                                                                                                                                                                                                                                                                                                                                                                                                                                                                                                                                                                                                                                                                                                                                                                                                                                                                                                                                               |
| Atrial fibrillation                                            | ICD-9 Dx codes:<br>{“427.3”, “427.31”, “427.32”}                                                                                                                                                                                                                                                                                                                                                                                                                                                                                                                                                                                                                                                                                                                                                                                                                                                                                                                                                                                                                                                                                                                                                                                                            |

|                             |                                                                                                                                                                                                                                                                                                                                                                                                                                                                                                                                                                                                                                                                                                                                                                                                                                                                                                                                                                                                                                                                                                                                                                                                                                                                                                                                                                                                                                                                                                                                                                                                                                                                                                                                                                                                                                                                                                                                                                                                                                                                                                                                                                                                                                                                                                                                                                 |
|-----------------------------|-----------------------------------------------------------------------------------------------------------------------------------------------------------------------------------------------------------------------------------------------------------------------------------------------------------------------------------------------------------------------------------------------------------------------------------------------------------------------------------------------------------------------------------------------------------------------------------------------------------------------------------------------------------------------------------------------------------------------------------------------------------------------------------------------------------------------------------------------------------------------------------------------------------------------------------------------------------------------------------------------------------------------------------------------------------------------------------------------------------------------------------------------------------------------------------------------------------------------------------------------------------------------------------------------------------------------------------------------------------------------------------------------------------------------------------------------------------------------------------------------------------------------------------------------------------------------------------------------------------------------------------------------------------------------------------------------------------------------------------------------------------------------------------------------------------------------------------------------------------------------------------------------------------------------------------------------------------------------------------------------------------------------------------------------------------------------------------------------------------------------------------------------------------------------------------------------------------------------------------------------------------------------------------------------------------------------------------------------------------------|
| Common autoimmune disorders | ICD-9 codes:<br>{ "136.1", "242", "242.01", "281.0", "282", "283.0", "340", "357.0", "358.0", "364.01", "446.7", "555.2", "555.9", "696", "710.2", "710.4", "720.0", "245.2", "364.00", "443.1", "446", "446.1", "446.2", "446.21", "446.29", "446.4", "446.5", "555.0", "555.1", "579.0", "694.4", "704.01", "710.0", "710.1", "710.3", "714", "725", "696.0", "696.1", "696.2", "696.3", "696.4", "696.5", "696.8", "714.0", "714.1", "714.2", "714.4", "714.8", "714.81", "714.89", "714.9", "358.00", "358.01", "446.0", "446.20", "556.0", "556.1", "556.2", "556.3", "556.4", "556.5", "556.6", "556.8", "556.9", "694.5", "694.6", "694.60", "694.61" }                                                                                                                                                                                                                                                                                                                                                                                                                                                                                                                                                                                                                                                                                                                                                                                                                                                                                                                                                                                                                                                                                                                                                                                                                                                                                                                                                                                                                                                                                                                                                                                                                                                                                                  |
| Diabetes                    | ICD-9 Dx Codes:<br>{ "250.0", "250.00", "250.01", "250.02", "250.03", "250.1", "250.10", "250.11", "250.12", "250.13", "250.2", "250.20", "250.21", "250.22", "250.23", "250.3", "250.30", "250.31", "250.32", "250.33", "250.4", "250.40", "250.41", "250.42", "250.43", "250.5", "250.50", "250.51", "250.52", "250.53", "250.6", "250.60", "250.61", "250.62", "250.63", "250.7", "250.70", "250.71", "250.72", "250.73", "250.8", "250.80", "250.81", "250.82", "250.83", "250.9", "250.90", "250.91", "250.92", "250.93" }                                                                                                                                                                                                                                                                                                                                                                                                                                                                                                                                                                                                                                                                                                                                                                                                                                                                                                                                                                                                                                                                                                                                                                                                                                                                                                                                                                                                                                                                                                                                                                                                                                                                                                                                                                                                                                 |
| Skin disorders              | ICD-9 Dx Codes:<br>{ "V19.4", "680", "680.0", "680.1", "680.2", "680.3", "680.4", "680.5", "680.6", "680.7", "680.8", "680.9", "681", "681.0", "681.00", "681.01", "681.02", "681.1", "681.10", "681.11", "681.1", "682", "682.0", "682.1", "682.2", "682.3", "682.4", "682.5", "682.6", "682.7", "682.8", "682.9", "684", "685", "685.0", "685.1", "686", "686.0", "686.00", "686.01", "686.09", "686.1", "686.8", "686.9", "690", "690.1", "690.10", "690.11", "690.12", "690.18", "690.8", "691", "691.0", "691.8", "692", "692.0", "692.1", "692.2", "692.3", "692.4", "692.5", "692.6", "692.7", "692.70", "692.71", "692.72", "692.73", "692.74", "692.75", "692.76", "692.77", "692.79", "692.8", "692.81", "692.82", "692.83", "692.84", "692.89", "692.9", "693", "693.0", "693.1", "693.8", "693.9", "694", "694.0", "694.1", "694.2", "694.3", "694.4", "694.5", "694.6", "694.60", "694.61", "694.8", "694.9", "695", "695.0", "695.1", "695.10", "695.11", "695.12", "695.13", "695.14", "695.15", "695.19", "695.2", "695.3", "695.4", "695.5", "695.50", "695.51", "695.52", "695.53", "695.54", "695.55", "695.56", "695.57", "695.58", "695.59", "695.8", "695.81", "695.89", "695.9", "696", "696.0", "696.1", "696.2", "696.3", "696.4", "696.5", "696.8", "697", "697.0", "697.1", "697.8", "697.9", "698", "698.0", "698.1", "698.2", "698.3", "698.4", "698.8", "698.9", "700", "701", "701.0", "701.1", "701.2", "701.3", "701.4", "701.5", "701.8", "701.9", "702", "702.0", "702.1", "702.11", "702.19", "702.8", "703", "703.0", "703.8", "703.9", "704", "704.0", "704.00", "704.01", "704.02", "704.09", "704.1", "704.2", "704.3", "704.4", "704.41", "704.42", "704.8", "704.9", "705", "705.0", "705.1", "705.2", "705.21", "705.22", "705.8", "705.81", "705.82", "705.83", "705.89", "705.9", "706", "706.0", "706.1", "706.2", "706.3", "706.8", "706.9", "707", "707.0", "707.00", "707.01", "707.02", "707.03", "707.04", "707.05", "707.06", "707.07", "707.09", "707.1", "707.10", "707.11", "707.12", "707.13", "707.14", "707.15", "707.19", "707.2", "707.20", "707.21", "707.22", "707.23", "707.24", "707.25", "707.8", "707.9", "708", "708.0", "708.1", "708.2", "708.3", "708.4", "708.5", "708.8", "708.9", "709", "709.0", "709.00", "709.01", "709.09", "709.1", "709.2", "709.3", "709.4", "709.8", "709.9" } |
| Renal dysfunction           | ICD-9 Dx Codes:<br>{ "585.1", "585.2", "585.3", "585.4", "585.5", "585.6", "585.9", "586", "403", "403.0", "403.00", "403.01", "403.1", "403.10", "403.11", "403.9", "403.90", "403.91", "404", "404.0", "404.00", "404.01", "404.02", "404.03", "404.1", "404.10", "404.11", "404.12", "404.13", "404.9", "404.90", "404.91", "404.92", "404.93", "274.10", "440.1", "442.1", "453.3", "581", "581.0", "581.1", "581.2", "581.3", "581.8", "581.81", "581.89", "581.9", "593", "593.0", "593.1", "593.2", "593.3", "593.4", "593.5", "593.6", "593.7", "593.70", "593.71", "593.72", "593.73", "593.8", "593.81", "593.82", "593.89", "593.9", "753.0", "753.3", "866.00", "866.01", "866.1", "866.10", "866.11", "866.12", "866.13", "572.4", "580", "580.0", "580.4", "580.8", "580.81", "580.89", "580.9", "584", "584.5", "584.6", "584.7", "584.8", "584.9", "791.2", "791.3" }                                                                                                                                                                                                                                                                                                                                                                                                                                                                                                                                                                                                                                                                                                                                                                                                                                                                                                                                                                                                                                                                                                                                                                                                                                                                                                                                                                                                                                                                           |
| Liver disease               | ICD-9 Dx codes:<br>{ "070.0", "070.1", "070.2", "070.20", "070.21", "070.22", "070.23", "070.3", "070.30", "070.31", "070.32", "070.33", "070.4", "070.41", "070.42", "070.43", "070.44", "070.49", "070.5", "070.51", "070.52", "070.53", "070.54", "070.59", "070.6", "070.7", "070.70", "070.71", "070.9", "456.0", "456.1", "456.2", "456.20", "456.21", "570", "571.0", "571.1", "571.2", "571.3", "571.4", "571.40", "571.41", "571.42", "571.49", "571.5", "571.6", "571.8", "571.9", "572.0", "572.1", "572.2", "572.3", "572.4", "572.8", "573.0", "573.1", "573.2", "573.3", "573.4", "573.5", "573.8", "573.9", "576.8", "782.4", "789.5", "789.51", "789.59" }                                                                                                                                                                                                                                                                                                                                                                                                                                                                                                                                                                                                                                                                                                                                                                                                                                                                                                                                                                                                                                                                                                                                                                                                                                                                                                                                                                                                                                                                                                                                                                                                                                                                                      |
| Asthma/COPD                 | ICD-9 Dx codes:<br>{ "493.0", "493.00", "493.01", "493.02", "493.1", "493.10", "493.11", "493.12", "493.2", "493.20", "493.21", "493.22", "493.8", "493.81", "493.82", "493.9", "493.90", "493.91", "493.92" }<br>{ "493.0", "493.00", "493.01", "493.02", "493.1", "493.10", "493.11", "493.12", "493.2", "493.20", "493.21", "493.22", "493.8", "493.81", "493.82", "493.9", "493.90", "493.91", "493.92" }                                                                                                                                                                                                                                                                                                                                                                                                                                                                                                                                                                                                                                                                                                                                                                                                                                                                                                                                                                                                                                                                                                                                                                                                                                                                                                                                                                                                                                                                                                                                                                                                                                                                                                                                                                                                                                                                                                                                                   |

|                       |                                                                                                                                                                                                                                                                                                                                                                                                                                                                                                                                                                                                                                                                                                                                                                                                                                                                                                                                                                                                                                                                                                                                                                                                                                                                                                                                                                                                                                                                                                                                                                                                                                                                                                                                                                                                                                                                                                                                                                                                                                                                                                                                                                                                                                                                                                                                                                                                                                                                            |
|-----------------------|----------------------------------------------------------------------------------------------------------------------------------------------------------------------------------------------------------------------------------------------------------------------------------------------------------------------------------------------------------------------------------------------------------------------------------------------------------------------------------------------------------------------------------------------------------------------------------------------------------------------------------------------------------------------------------------------------------------------------------------------------------------------------------------------------------------------------------------------------------------------------------------------------------------------------------------------------------------------------------------------------------------------------------------------------------------------------------------------------------------------------------------------------------------------------------------------------------------------------------------------------------------------------------------------------------------------------------------------------------------------------------------------------------------------------------------------------------------------------------------------------------------------------------------------------------------------------------------------------------------------------------------------------------------------------------------------------------------------------------------------------------------------------------------------------------------------------------------------------------------------------------------------------------------------------------------------------------------------------------------------------------------------------------------------------------------------------------------------------------------------------------------------------------------------------------------------------------------------------------------------------------------------------------------------------------------------------------------------------------------------------------------------------------------------------------------------------------------------------|
|                       | TARTRATE”, “PIRBUTEROL ACETATE”, “BUDESONIDE/FORMOTEROL FUMARATE”, “TIOTROPIUM BROMIDE”, “SALMETEROL XINAFOATE”, “THEOPHYLLINE/POTASSIUM IODIDE”, “FLUTICASONE FUROATE”, “FORMOTEROL FUMARATE”, “ZAFIRLUKAST”, “FLUTICASONE PROPIONATE/SALMETEROL XINAFOATE”, “IPRATROPIUM BROMIDE/ALBUTEROL SULFATE”, “ALBUTEROL”, “TERBUTALINE SULFATE”, “LEVALBUTEROL HCL”, “BUDESONIDE”, “MOMETASONE FUROATE”, “THEOPHYLLINE/EPHEDRINE HCL/PHENOBARBITAL”, “IPRATROPIUM BROMIDE”, “THEOPHYLLINE/EPHEDRINE/HYDROXYZINE”, “FLUTICASONE PROPIONATE”, “MONTELUKAST SODIUM”, “METAPROTERENOL SULFATE”, “THEOPHYLLINE ANHYDROUS”, “BUDESONIDE, MICRONIZED”, “THEOPHYLLINE IN DEXTROSE 5 % IN WATER”, “THEOPHYLLINE/DIETARY SUPPLEMENT,MISC.COMB.NO.9”, “THEOPHYLLINE/CAFFEINE/AA NO.13/CINNAMON/HERBAL 135”}                                                                                                                                                                                                                                                                                                                                                                                                                                                                                                                                                                                                                                                                                                                                                                                                                                                                                                                                                                                                                                                                                                                                                                                                                                                                                                                                                                                                                                                                                                                                                                                                                                                                                 |
| <b>Medication use</b> |                                                                                                                                                                                                                                                                                                                                                                                                                                                                                                                                                                                                                                                                                                                                                                                                                                                                                                                                                                                                                                                                                                                                                                                                                                                                                                                                                                                                                                                                                                                                                                                                                                                                                                                                                                                                                                                                                                                                                                                                                                                                                                                                                                                                                                                                                                                                                                                                                                                                            |
| Opioids               | { “HYDROCODONE TANNATE/CHLORPHENIRAMINE TANNATE”, “CODEINE/ASPIRIN/SALICYLAMIDE/ACETAMINOPHEN/CAFFEINE”, “HYDROCODONE BITARTRATE/ACETAMINOPHEN/DIETARY SUPPLEMENT #11”, “HYDROMORPHONE HCL/GUAIFENESIN”, “HYDROMORPHONE HCL IN DEXTROSE 5 %-WATER/PF”, “OXYCODONE HCL/ASPIRIN”, “CODEINE PHOSPHATE/PYRILAMINE MALEATE”, “CODEINE POLISTIREX/CHLORPHENIRAMINE POLISTIREX”, “FENTANYL HCL”, “MEPERIDINE HCL/ATROPINE SULFATE”, “MORPHINE SULFATE/DEXTROSE 5%-WATER/PF”, “CODEINE/CALCIUM IODIDE”, “FENTANYL CITRATE/DROPERIDOL”, “MORPHINE SULFATE LIPOSOMAL/PF”, “OXYCODONE/ASPIRIN”, “MORPHINE SULFATE/NALTREXONE HCL”, “MORPHINE SULFATE/DEXTROSE 5 % IN WATER”, “MEPERIDINE HCL IN 0.9 % SODIUM CHLORIDE”, “HYDROMORPHONE HCL/BUPIVACAINE HCL IN 0.9% SODIUM CHLORIDE/PF”, “PROPOXYPHENE NAPSYLATE”, “MEPERIDINE HCL/PROMETHAZINE HCL”, “HYDROCODONE BITARTRATE/ASPIRIN”, “CODEINE PHOSPHATE”, “HYDROCODONE POLISTIREX/CHLORPHENIRAMINE POLISTIREX”, “CODEINE SULFATE”, “CODEINE PHOSPHATE/BROMODIPHENHYDRAMINE HCL”, “HYDROCODONE BITARTRATE/HOMATROPINE METHYLBROMIDE”, “HYDROCODONE BITARTRATE”, “MEPERIDINE HCL/PF”, “FENTANYL CITRATE/ROPIVACAINE HCL/SODIUM CHLORIDE 0.9%/PF”, “HYDROCODONE BITARTRATE/HOMATROPINE”, “HYDROMORPHONE HCL IN 0.9 % SODIUM CHLORIDE/PF”, “MORPHINE SULFATE IN 0.9 % SODIUM CHLORIDE/PF”, “HYDROMORPHONE HCL/PF”, “OXYCODONE HCL/OXYCODONE TEREPHTHALATE/ASPIRIN”, “HYDROMORPHONE HCL IN 0.9 % SODIUM CHLORIDE”, “MORPHINE SULFATE IN 0.9 % SODIUM CHLORIDE”, “MORPHINE SULFATE/PF”, “HYDROCODONE BITARTRATE/PSEUDOEPHEDRINE HCL/GUAIFENESIN”, “FENTANYL CITRATE IN 0.9 % SODIUM CHLORIDE/PF”, “PROPOXYPHENE HCL/ASPIRIN/CAFFEINE”, “HYDROCODONE/IBUPROFEN”, “FENTANYL CITRATE/BUPIVACAINE HCL IN 0.9 % SODIUM CHLORIDE/PF”, “CODEINE PHOSPHATE/BUTALBITAL/ASPIRIN/CAFFEINE”, “OXYMORPHONE HCL”, “PROPOXYPHENE HCL/ACETAMINOPHEN”, “FENTANYL CITRATE/PF”, “FENTANYL CITRATE”, “TRAMADOL HCL/ACETAMINOPHEN”, “FENTANYL”, “MEPERIDINE HCL”, “PROPOXYPHENE HCL”, “HYDROMORPHONE HCL”, “OXYCODONE HCL”, “PROPOXYPHENE NAPSYLATE/ACETAMINOPHEN”, “OXYCODONE HCL/ACETAMINOPHEN”, “TRAMADOL HCL”, “MORPHINE SULFATE”, “HYDROCODONE BITARTRATE/ACETAMINOPHEN”, “ASPIRIN/CODEINE PHOSPHATE”, “CARISOPRODOL/ASPIRIN/CODEINE PHOSPHATE”, “FENTANYL CITRATE IN DEXTROSE 5 % IN WATER/PF”, “HYDROCODONE BITARTRATE/CHLORPHENIRAMINE MALEATE”, “MORPHINE SULFATE IN SODIUM CHLORIDE, ISO-OSMOTIC/PF”, “TRAMADOL HCL/DIETARY SUPPLEMENT,MISC. CB.11”} |
| Lithium               | {“LITHIUM CARBONATE”, “LITHIUM CITRATE”, “LITHIUM CITRATE TETRAHYDRATE”}                                                                                                                                                                                                                                                                                                                                                                                                                                                                                                                                                                                                                                                                                                                                                                                                                                                                                                                                                                                                                                                                                                                                                                                                                                                                                                                                                                                                                                                                                                                                                                                                                                                                                                                                                                                                                                                                                                                                                                                                                                                                                                                                                                                                                                                                                                                                                                                                   |
| Antipsychotics        | { “ACEPROMAZINE MALEATE”, “ARIPIRAZOLE”, “ASENAPINE MALEATE”, “CHLORPROMAZINE HCL”, “CLOZAPINE”, “FLUPHENAZINE DECANOATE”, “FLUPHENAZINE ENANTHATE”, “FLUPHENAZINE HCL”, “HALOPERIDOL”, “HALOPERIDOL DECANOATE”, “HALOPERIDOL LACTATE”, “ILOPERIDONE”, “LOXAPINE”, “LOXAPINE HCL”, “LOXAPINE SUCCINATE”, “LURASIDONE HCL”, “MESORIDAZINE BESYLATE”, “MOLINDONE HCL”, “OLANZAPINE”, “OLANZAPINE PAMOATE”, “OLANZAPINE/FLUOXETINE HCL”, “PALIPERIDONE”, “PALIPERIDONE PALMITATE”, “PERPHENAZINE”, “PERPHENAZINE/AMITRIPTYLINE HCL”, “PIMOZIDE”, “PROMAZINE HCL”, “PROPIOMAZINE HCL”, “QUETIAPINE FUMARATE”, “RISPERIDONE”, “RISPERIDONE MICROSPHERES”, “THIORIDAZINE HCL”, “THIOTHIXENE”, “THIOTHIXENE HCL”, “TRIFLUOPERAZINE HCL”, “TRIFLUPROMAZINE HCL”, “ZIPRASIDONE HCL”, “ZIPRASIDONE MESYLATE” }                                                                                                                                                                                                                                                                                                                                                                                                                                                                                                                                                                                                                                                                                                                                                                                                                                                                                                                                                                                                                                                                                                                                                                                                                                                                                                                                                                                                                                                                                                                                                                                                                                                                       |
| Antidepressants       | { “BUPROPION HBR”, “DESVENLAFAXINE FUMARATE”, “ISOCARBOXAZID”, “PHENELZINE SULFATE”, “VORTIOXETINE HYDROBROMIDE”, “DESVENLAFAXINE”, “PAROXETINE MESYLATE”, “FLUOXETINE”, “PROTRIPTYLINE HCL”, “IMIPRAMINE PAMOATE”, “OLANZAPINE/FLUOXETINE HCL”, “DESVENLAFAXINE SUCCINATE”, “TRIMIPRAMINE MALEATE”, “AMITRIPTYLINE HCL/CHLORDIAZEPOXIDE”, “CLOMIPRAMINE HCL”, “NEFAZODONE HCL”, “AMOXAPINE”, “MAPROTILINE HCL”, “ESCITALOPRAM OXALATE”, “DULOXETINE HCL”, “MIRTAZAPINE”, “PERPHENAZINE/AMITRIPTYLINE HCL”, “DESIPRAMINE HCL”, “NORTRIPTYLINE HCL”, “CITALOPRAM HYDROBROMIDE”,                                                                                                                                                                                                                                                                                                                                                                                                                                                                                                                                                                                                                                                                                                                                                                                                                                                                                                                                                                                                                                                                                                                                                                                                                                                                                                                                                                                                                                                                                                                                                                                                                                                                                                                                                                                                                                                                                             |



|                      |                                                                                                                                                                                                                                                                                                                                                                                                                                                                                                                                                                                                                                                                                                                                                                                                                                                                                                                                                                                                                                                                  |
|----------------------|------------------------------------------------------------------------------------------------------------------------------------------------------------------------------------------------------------------------------------------------------------------------------------------------------------------------------------------------------------------------------------------------------------------------------------------------------------------------------------------------------------------------------------------------------------------------------------------------------------------------------------------------------------------------------------------------------------------------------------------------------------------------------------------------------------------------------------------------------------------------------------------------------------------------------------------------------------------------------------------------------------------------------------------------------------------|
|                      | <p>“PAROXETINE HCL”, “SERTRALINE HCL”, “IMIPRAMINE HCL”, “FLUOXETINE HCL”, “VENLAFAXINE HCL”, “TRAZODONE HCL”, “BUPROPION HCL”, “DOXEPIH HCL”, “AMITRIPTYLINE HCL”, “BUPROPION HCL/DIETARY SUPPLEMENT COMBINATION NO.15”, “BUPROPION HCL/DIETARY SUPPLEMENT COMBINATION NO.16”, “FLUOXETINE HCL/DIETARY SUPPLEMENT NO.17”, “FLUOXETINE HCL/DIETARY SUPPLEMENT NO.8”, “FLUVOXAMINE MALEATE”, “LEVOMILNACIPRAN HCL”, “TRAZODONE HCL/DIETARY SUPPLEMENT NO.8”, “VILAZODONE HCL” }</p>                                                                                                                                                                                                                                                                                                                                                                                                                                                                                                                                                                               |
| NSAIDs               | <p>{ “IBUPROFEN/FAMOTIDINE”, “CHLORPHENIRAMINE MALEATE/PHENYLEPHRINE HCL/IBUPROFEN”, “MELOXICAM/IRRITANTS COUNTER-IRRITANTS COMBINATION NO.2”, “CHLORPHENIRAMINE MALEATE/PSEUDOEPHEDRINE HCL/IBUPROFEN”, “DICLOFENAC SUBMICRONIZED”, “IBUPROFEN/OXYCODONE HCL”, “KETOROLAC TROMETHAMINE/PF”, “INDOMETHACIN SODIUM”, “LANSOPRAZOLE/NAPROXEN”, “IBUPROFEN LYSINE/PF”, “NAPROXEN/ESOMEPRAZOLE MAGNESIUM”, “IBUPROFEN/PHENYLEPHRINE HCL”, “IBUPROFEN/DIPHENHYDRAMINE HCL”, “SUMATRIPTAN SUCCINATE/NAPROXEN SODIUM”, “FLURBIPROFEN SODIUM”, “NAPROXEN SODIUM/PSEUDOEPHEDRINE HCL”, “DICLOFENAC EPOLAMINE”, “IBUPROFEN/DIPHENHYDRAMINE CITRATE”, “DICLOFENAC SODIUM/MISOPROSTOL”, “IBUPROFEN/PSEUDOEPHEDRINE HCL”, “DICLOFENAC POTASSIUM”, “HYDROCODONE/IBUPROFEN”, “FLURBIPROFEN”, “SULINDAC”, “KETOROLAC TROMETHAMINE”, “MELOXICAM”, “PIROXICAM”, “ETODOLAC”, “DICLOFENAC SODIUM”, “INDOMETHACIN”, “NAPROXEN SODIUM”, “NAPROXEN”, “IBUPROFEN”, “IBUPROFEN/IRRITANTS COUNTER-IRRITANTS COMBINATION NO.2”, “NAPROXEN/IRRITANT COUNTER-IRRITANT COMBINATION NO.2” }</p> |
| Benzodiazepines      | <p>{“ALPRAZOLAM”, “CHLORDIAZEPOXIDE”, “CLONAZEPAM”, “CLORAZEPATE DIPOTASSIUM”, “DIAZEPAM”, “ESTAZOLAM”, “FLURAZEPAM HCL”, “HALAZEPAM”, “LORAZEPAM”, “MIDAZOLAM”, “OXAZEPAM”, “QUAZEPAM”, “TEMAZEPAM”, “TRIAZOLAM”}</p>                                                                                                                                                                                                                                                                                                                                                                                                                                                                                                                                                                                                                                                                                                                                                                                                                                           |
| Migraine products    | <p>{ “DIHYDROERGOTAMINE MESYLATE”, “ERGOTAMINE TARTRATE”, “ERGOTAMINE TARTRATE/BELLADONNA ALKALOIDS/PHENOBARBITAL”, “ERGOTAMINE TARTRATE/CAFFEINE”, “ERGOTAMINE TARTRATE/CAFFEINE/BELLADONNA ALKALOIDS/PENTOBARB”, “5-HYDROXY-L-TRYPTOPHAN (OXITRIPTAN)”, “ALMOTRIPTAN MALATE”, “ELETRIPTAN HYDROBROMIDE”, “FROVATRIPTAN SUCCINATE”, “NARATRIPTAN HCL”, “RIZATRIPTAN BENZOATE”, “SUMATRIPTAN”, “SUMATRIPTAN SUCCINATE”, “SUMATRIPTAN SUCCINATE/MENTHOL/CAMPHOR”, “SUMATRIPTAN SUCCINATE/NAPROXEN SODIUM”, “ZOLMITRIPTAN” }</p>                                                                                                                                                                                                                                                                                                                                                                                                                                                                                                                                   |
| Antiparkinson agents | <p>{“AMANTADINE HCL”, “BENZTROPINE MESYLATE”, “BIPERIDEN HCL”, “CARBIDOPA”, “CARBIDOPA/LEVODOPA”, “CARBIDOPA/LEVODOPA/ENTACAPONE”, “LEVODOPA”, “PERGOLIDE MESYLATE”, “PROCYCLIDINE HCL”, “RASAGILINE MESYLATE”, “ROPINIROLE HCL”, “ROTIGOTINE”, “SELEGILINE”, “SELEGILINE HCL”, “TOLCAPONE”, “TRIHEXYPHENIDYL HCL” }</p>                                                                                                                                                                                                                                                                                                                                                                                                                                                                                                                                                                                                                                                                                                                                         |
| Dementia medication  | <p>{ “DONEPEZIL HCL”, “ERGOLOID MESYLATES”, “GALANTAMINE HBR”, “MEMANTINE HCL”, “MEMANTINE HCL/DONEPEZIL HCL”, “RIVASTIGMINE”, “RIVASTIGMINE TARTRATE”, “TACRINE HCL” }</p>                                                                                                                                                                                                                                                                                                                                                                                                                                                                                                                                                                                                                                                                                                                                                                                                                                                                                      |
| Muscle relaxants     | <p>{ “BACLOFEN”, “CARISOPRODOL”, “CARISOPRODOL/ASPIRIN”, “CARISOPRODOL/ASPIRIN/CODEINE PHOSPHATE”, “CARISOPRODOL/DIETARY SUPPLEMENT,MISC. CB.11”, “CHLORZOXAZONE”, “CYCLOBENZAPRINE HCL”, “CYCLOBENZAPRINE HCL/CAPSAICIN/MENTHOL”, “CYCLOBENZAPRINE HCL/DIETARY SUPPLEMENT, MISC. CB.11”, “CYCLOBENZAPRINE HCL/IRRITANTS COUNTER-IRRITANTS COMBO NO.2”, “CYCLOBENZAPRINE HCL/TENS UNIT ELECTRODES”, “CYCLOBENZAPRINE HCL/TENS UNIT/TENS UNIT ELECTRODES”, “METAXALONE”, “METHOCARBAMOL”, “METHOCARBAMOL/ASPIRIN”, “ORPHENADRINE CITRATE”, “ORPHENADRINE CITRATE/ACETAMINOPHEN”, “ORPHENADRINE CITRATE/ASPIRIN/CAFFEINE”, “TIZANIDINE HCL”, “TIZANIDINE HCL/IRRITANT COUNTER-IRRITANTS COMBINATION NO.2”, “DANTROLENE SODIUM” }</p>                                                                                                                                                                                                                                                                                                                               |
| Anticonvulsants      | <p>{ “AMINOPHYLLINE/EPHEDRINE/POTASSIUM IODIDE/PHENOBARBITAL”, “BELLADONNA ALKALOIDS/PHENOBARBITAL”, “CARBAMAZEPINE”, “DIVALPROEX SODIUM”, “ERGOTAMINE TARTRATE/BELLADONNA ALKALOIDS/PHENOBARBITAL”, “ESLICARBAZEPINE ACETATE”, “ETHOSUXIMIDE”, “ETHOTOIN”, “EZOGABINE”, “FELBAMATE”, “FOSPHENYTOIN SODIUM”, “GABAPENTIN”, “GABAPENTIN ENACARBIL”, “GABAPENTIN/DIETARY SUPPLEMENT, MISC COMBO NO.11”, “GUAIFENESIN/DYPHYLLINE/EPHEDRINE/PHENOBARBITAL”, “HYOSCYAMINE SULFATE/PHENOBARBITAL”, “LACOSAMIDE”, “LAMOTRIGINE”, “LEVETIRACETAM”, “LEVETIRACETAM IN SODIUM CHLORIDE, ISO-OSMOTIC”, “MEPHENYTOIN”, “MEPHOBARBITAL”, “METHSUXIMIDE”, “OXCARBAZEPINE”, “PERAMPANEL”, “PHENOBARBITAL”, “PHENOBARBITAL SODIUM”, “PHENOBARBITAL SODIUM IN 0.9 % SODIUM CHLORIDE”, “PHENOBARBITAL/HYOSCYAMINE SULF/ATROPINE SULF/SCOPOLAMINE HB”, “PHENTERMINE HCL/TOPIRAMATE”, “PHENYTOIN”, “PHENYTOIN SODIUM”, “PHENYTOIN SODIUM EXTENDED”, “PREGABALIN”, “PRIMIDONE”, “PROPANTHELINE BROMIDE/PHENOBARBITAL”, “RUFINAMIDE”, “THEOPHYLLINE/EPHEDRINE HCL/PHENOBARBITAL”,</p>  |

|                              |                                                                                                                                                                                                                                                                                                                                                                                                                                                                                                                                                                                                                                                                                                                                                                                                                                                                                                                                                                                                                                                                                                                                                                                                                                                                                                                                                                                                                                                                                                                                                                                                                                                                                                                                                                                                                                                                                                                                                                                                                                                                                                                                                                                                                                                                                                                                                                                                                                                                                                                                                                                                                                                                                                                                                                                                                                                                                                                                                                                                                                                                                                                                                                                                                                                                                         |
|------------------------------|-----------------------------------------------------------------------------------------------------------------------------------------------------------------------------------------------------------------------------------------------------------------------------------------------------------------------------------------------------------------------------------------------------------------------------------------------------------------------------------------------------------------------------------------------------------------------------------------------------------------------------------------------------------------------------------------------------------------------------------------------------------------------------------------------------------------------------------------------------------------------------------------------------------------------------------------------------------------------------------------------------------------------------------------------------------------------------------------------------------------------------------------------------------------------------------------------------------------------------------------------------------------------------------------------------------------------------------------------------------------------------------------------------------------------------------------------------------------------------------------------------------------------------------------------------------------------------------------------------------------------------------------------------------------------------------------------------------------------------------------------------------------------------------------------------------------------------------------------------------------------------------------------------------------------------------------------------------------------------------------------------------------------------------------------------------------------------------------------------------------------------------------------------------------------------------------------------------------------------------------------------------------------------------------------------------------------------------------------------------------------------------------------------------------------------------------------------------------------------------------------------------------------------------------------------------------------------------------------------------------------------------------------------------------------------------------------------------------------------------------------------------------------------------------------------------------------------------------------------------------------------------------------------------------------------------------------------------------------------------------------------------------------------------------------------------------------------------------------------------------------------------------------------------------------------------------------------------------------------------------------------------------------------------------|
|                              | <p>“THEOPHYLLINE/EPHEDRINE/POTASSIUM IODIDE/PHENOBARBITAL”, “TIAGABINE HCL”, “TOPIRAMATE”, “VALPROIC ACID”, “VALPROIC ACID (AS SODIUM SALT) (VALPROATE SODIUM)”, “VIGABATRIN”, “ZONISAMIDE” }</p>                                                                                                                                                                                                                                                                                                                                                                                                                                                                                                                                                                                                                                                                                                                                                                                                                                                                                                                                                                                                                                                                                                                                                                                                                                                                                                                                                                                                                                                                                                                                                                                                                                                                                                                                                                                                                                                                                                                                                                                                                                                                                                                                                                                                                                                                                                                                                                                                                                                                                                                                                                                                                                                                                                                                                                                                                                                                                                                                                                                                                                                                                       |
| CNS Stimulants               | <p>{ “ACETAMINOPHEN/CAFFEINE”, “ACETAMINOPHEN/CAFFEINE/DIHYDROCODEINE BITARTRATE”, “ACETAMINOPHEN/CALCIUM CARBONATE/CAFFEINE/GLYCINE”, “ACETAMINOPHEN/CALCIUM CARBONATE/MAGNESIUM/CAFFEINE/CALCIUM”, “ACETAMINOPHEN/PHENYLTOLOXAMINE CITRATE/CAFFEINE”, “ACETAMINOPHEN/PYRILAMINE MALEATE/CAFFEINE”, “ASPIRIN/ACETAMINOPHEN/CAFFEINE”, “ASPIRIN/ACETAMINOPHEN/CAFFEINE/CALCIUM”, “ASPIRIN/ACETAMINOPHEN/CAFFEINE/POTASSIUM”, “ASPIRIN/ACETAMINOPHEN/MAGNESIUM/ALUMINUM HYDROXIDE/CAFFEINE”, “ASPIRIN/CAFFEINE”, “ASPIRIN/CAFFEINE/DIHYDROCODEINE”, “ASPIRIN/CAFFEINE/DIHYDROCODEINE BITARTRATE”, “ASPIRIN/MAGNESIUM HYDROXIDE/ALUMINUM HYDROXIDE/CAFFEINE”, “ASPIRIN/SALICYLAMIDE/ACETAMINOPHEN/CAFFEINE”, “ASPIRIN/SALICYLAMIDE/CAFFEINE”, “BUTALBITAL/ACETAMINOPHEN/CAFFEINE”, “BUTALBITAL/ACETAMINOPHEN/CAFFEINE/CODEINE PHOSPHATE”, “BUTALBITAL/ASPIRIN/CAFFEINE”, “CA/SOY ISOFLA/BLK COHOSH RT/MAGNOLIA/GREEN TEA LEAF/CAFFEINE”, “CAFFEINE”, “CAFFEINE CITRATE”, “CAFFEINE/AMINO ACIDS COMBINATION NO.13/CINNAMON/HERBAL 135”, “CAFFEINE/CHOLINE BITARTRATE/AA NO.11/HERBAL COMPLEX NO. 130”, “CAFFEINE/CHOLINE BITARTRATE/AMINO ACID NO.7/HERBAL NO.125”, “CAFFEINE/CHOLINE/AMINO ACIDS NO.12/HERBAL NO.131”, “CAFFEINE/DEXTROSE”, “CAFFEINE/ETHYL ALCOHOL”, “CAFFEINE/NIACIN/PYRIDOXINE/HERBAL COMPLEX NO. 133”, “CAFFEINE/PRASTERONE (DHEA)/PYRIDOXINE/HERBAL COMPLEX NO. 132”, “CAFFEINE/SODIUM BENZOATE”, “CINNAMEDRINE HCL/ASPIRIN/CAFFEINE”, “CODEINE PHOSPHATE/BUTALBITAL/ASPIRIN/CAFFEINE”, “CODEINE/ASPIRIN/SALICYLAMIDE/ACETAMINOPHEN/CAFFEINE”, “DEXTROMETHORPHAN HBR/SALICYLAMIDE/CHLORPHENIRAMINE/CAFFEINE”, “EPHEDRINE/ASPIRIN/ACETANILIDE/CAFFEINE”, “ERGOTAMINE TARTRATE/CAFFEINE”, “ERGOTAMINE TARTRATE/CAFFEINE/BELLADONNA ALKALOIDS/PENTOBARB”, “GUAIFENESIN/PHENYLEPHRINE HCL/ACETAMINOPHEN/CAFFEINE”, “GUAIFENESIN/PHENYLPROPANOLAMINE HCL/ACETAMINOPHEN/CAFFEINE”, “IBUPROFEN/CAFFEINE/VITAMINS B1, B2, B6, &amp; B12”, “ISOMETHEPTENE MUCATE/CAFFEINE/ACETAMINOPHEN”, “MAGNESIUM SALICYLATE/ACETAMINOPHEN/CAFFEINE”, “MAGNESIUM SALICYLATE/ACETAMINOPHEN/PHENYLTOLOXAMINE/CAFFEINE”, “MAGNESIUM SALICYLATE/CAFFEINE”, “METFORMIN/CAFFEINE/AMINO ACIDS 7/HERBAL COMB 125/CHOLINE BIT”, “MULTIVIT WITH MINERALS/FOLIC ACID/GUARANA/CAFFEINE”, “MULTIVIT,CALCIUM,IRON,MINERALS/FOLIC ACID/GUARANA, CAFFEINE”, “MULTIVIT,CALCIUM,IRON,MINS/FOLIC ACID/GUARANA SEED/CAFFEINE”, “MULTIVIT,CALCIUM,MIN/FERROUS FUM/FOLIC ACID/GUARANA/CAFFEINE”, “MULTIVITAMIN WITH MINERALS/FOLIC ACID/CAFFEINE”, “ORPHENADRINE CITRATE/ASPIRIN/CAFFEINE”, “PHENYLEPHRINE HCL/ACETAMINOPHEN/CAFFEINE”, “PHENYLEPHRINE HCL/SODIUM SALICYLATE/PHENIRAMINE/CAFFEINE”, “PHENYLPROPANOLAMINE HCL/ASPIRIN/CHLORPHENIRAMINE/CAFFEINE”, “PHENYLPROPANOLAMINE HCL/CAFFEINE”, “PHENYLPROPANOLAMINE/ACETAMINOPHEN/CHLORPHENIRAMINE/CAFFEINE”, “POTASSIUM SALICYLATE/SALICYLAMIDE/CAFFEINE”, “PROPOXYPHENE HCL/ASPIRIN/CAFFEINE”, “RESVERATROL/CHROMIUM PICO/GREEN TEA/EGCG/CAFFEINE/DIGESTIVE3”, “SALICYLAMIDE/ACETAMINOPHEN/CAFFEINE”, “SALICYLAMIDE/ACETAMINOPHEN/PHENYLTOLOXAMINE/CAFFEINE”, “SALICYLAMIDE/POTASSIUM NIT/CAFFEINE/BUCHU/JUNIPR/POTASS ACET”, “THEOPHYLLINE/CAFFEINE/AA NO.13/CINNAMON/HERBAL 135”, “WEIGHT LOSS KIT/CAFFEINE/CHOLINE BITARTRAT/AMINO AC7/HERB125” }</p> |
| Other anxiolytics/ hypnotics | <p>{ “ACETAMINOPHEN/DIPHENHYDRAMINE CITRATE”, “ACETAMINOPHEN/DIPHENHYDRAMINE HCL”, “AMINOGLUTETHIMIDE”, “ASPIRIN/DIPHENHYDRAMINE CITRATE”, “ASPIRIN/DIPHENHYDRAMINE HCL”, “ASPIRIN/DIPHENHYDRAMINE/SODIUM BICARBONATE/CITRIC ACID”, “ASPIRIN/MEPROBAMATE”, “BROMPHENIRAMINE MAL/DIPHENHYDRAMINE HCL/PHENYLEPHRINE HCL”, “BROMPHENIRAMINE MALEATE/DIPHENHYDRAMINE HCL”, “BUSPIRONE HCL”, “CARBETAPENTANE TANNATE/DIPHENHYDRAMINE TANNATE”, “CARBETAPENTANE TANNATE/PHENYLEPHRINE TANNATE/DIPHENHYDRAMINE”, “CHLORAL HYDRATE”, “CODEINE PHOSPHATE/BROMODIPHENHYDRAMINE HCL”, “DEXTROMETHORPHAN HBR/ACETAMINOPHEN/DIPHENHYDRAMINE HCL”, “DEXTROMETHORPHAN HBR/ACETAMINOPHEN/DOXYLAMINE”, “DEXTROMETHORPHAN HBR/DOXYLAMINE SUCCINATE”, “DEXTROMETHORPHAN HBR/PHENYLEPHRINE/ACETAMINOPHEN/DOXYLAMINE”, “DEXTROMETHORPHAN/PHENYLEPHRINE/DIPHENHYDRAMINE TANNATES”,</p>                                                                                                                                                                                                                                                                                                                                                                                                                                                                                                                                                                                                                                                                                                                                                                                                                                                                                                                                                                                                                                                                                                                                                                                                                                                                                                                                                                                                                                                                                                                                                                                                                                                                                                                                                                                                                                                                                                                                                                                                                                                                                                                                                                                                                                                                                                                                                                                                                        |

|  |                                                                                                                                                                                                                                                                                                                                                                                                                                                                                                                                                                                                                                                                                                                                                                                                                                                                                                                                                                                                                                                                                                                                                                                                                                                                                                                                                                                                                                                                                                                                                                                                                                                                                                                                                                                                                                                                                                                                                                                                                                                                                                                                                                                                                                                                                                                                                                                                                     |
|--|---------------------------------------------------------------------------------------------------------------------------------------------------------------------------------------------------------------------------------------------------------------------------------------------------------------------------------------------------------------------------------------------------------------------------------------------------------------------------------------------------------------------------------------------------------------------------------------------------------------------------------------------------------------------------------------------------------------------------------------------------------------------------------------------------------------------------------------------------------------------------------------------------------------------------------------------------------------------------------------------------------------------------------------------------------------------------------------------------------------------------------------------------------------------------------------------------------------------------------------------------------------------------------------------------------------------------------------------------------------------------------------------------------------------------------------------------------------------------------------------------------------------------------------------------------------------------------------------------------------------------------------------------------------------------------------------------------------------------------------------------------------------------------------------------------------------------------------------------------------------------------------------------------------------------------------------------------------------------------------------------------------------------------------------------------------------------------------------------------------------------------------------------------------------------------------------------------------------------------------------------------------------------------------------------------------------------------------------------------------------------------------------------------------------|
|  | <p> “DXTROMETHORPHAN/PSEUDOEPHRINE HCL/ACETAMINOPHEN/DOXYLAMINE”,<br/> “DIPHENHYDRAMINE CITRATE”, “DIPHENHYDRAMINE HCL”, “DIPHENHYDRAMINE HCL IN<br/> 0.9 % SODIUM CHLORIDE”, “DIPHENHYDRAMINE HCL/ALLANTOIN”, “DIPHENHYDRAMINE<br/> HCL/BENZETHONIUM CHLORIDE/ZINC ACETATE”, “DIPHENHYDRAMINE HCL/CALAMINE”,<br/> “DIPHENHYDRAMINE HCL/CAMPHOR/CALAMINE”, “DIPHENHYDRAMINE<br/> HCL/HYDROCORTISONE”, “DIPHENHYDRAMINE HCL/MENTHOL”, “DIPHENHYDRAMINE<br/> HCL/PHENYLEPHRINE HCL/ACETAMINOPHEN”, “DIPHENHYDRAMINE<br/> HCL/PHENYLEPHRINE HCL/ACETAMINOPHEN/GUAIFEN”, “DIPHENHYDRAMINE<br/> HCL/PHENYLEPHRINE HCL/CODEINE PHOSPHATE”, “DIPHENHYDRAMINE<br/> HCL/PHENYLEPHRINE HCL/DEXTROMETHORPHAN HBR”, “DIPHENHYDRAMINE<br/> HCL/TRIPELENNAMINE HCL/MENTHOL”, “DIPHENHYDRAMINE HCL/ZINC ACETATE”,<br/> “DIPHENHYDRAMINE TANNATE”,<br/> “DIPHENHYDRAMINE/PHENYLEPHRIN/DEXTROMETHORPH/ACETAMINOPHEN/GG”,<br/> “DOXYLAMINE SUCC/PSEUDOEPHEDRINE HCL/DEXTROMETHORPHAN HBR”,<br/> “DOXYLAMINE SUCCINATE”, “DOXYLAMINE SUCCINATE/PHENYLEPHRINE HCL”,<br/> “DOXYLAMINE SUCCINATE/PHENYLEPHRINE/DEXTROMETHORPHAN HBR/ASA”,<br/> “DOXYLAMINE SUCCINATE/PSEUDOEPHEDRINE HCL”, “DOXYLAMINE<br/> SUCCINATE/PYRIDOXINE HCL”,<br/> “DOXYLAMINE/PHENYLEPHRINE/DEXTROMETHORPHAN/ACETAMINOPHEN/GG”,<br/> “ESTROGENS, CONJUGATED/MEPROBAMATE”, “ESZOPICLONE”, “HYDROXYZINE HCL”,<br/> “HYDROXYZINE PAMOATE”, “IBUPROFEN/DIPHENHYDRAMINE CITRATE”,<br/> “IBUPROFEN/DIPHENHYDRAMINE HCL”, “MAGNESIUM SALICYLATE/DIPHENHYDRAMINE<br/> HCL”, “MEPROBAMATE”, “NAPROXEN SODIUM/DIPHENHYDRAMINE HCL”,<br/> “PHENYLEPHRINE HCL/ACETAMINOPHEN/DOXYLAMINE SUCCINATE”, “PHENYLEPHRINE<br/> HCL/DIPHENHYDRAMINE HCL”, “PHENYLEPHRINE HCL/HYDROCODONE<br/> BITARTRATE/DIPHENHYDRAMINE”, “PHENYLEPHRINE TANNATE/DIPHENHYDRAMINE<br/> TANNATE”, “PHENYLEPHRINE TANNATE/HYDROCODONE<br/> TANNATE/DIPHENHYDRAMINE”,<br/> “PHENYLEPHRINE/ACETAMINOPHEN/DIPHENHYDRAMINE/CHLORPHENIRAMINE”,<br/> “PHENYLPROPANOLAMINE HCL/ASPIRIN/DIPHENHYDRAMINE”, “PRAMOXINE<br/> HCL/DIPHENHYDRAMINE HCL”, “PSEUDOEPHEDRINE<br/> HCL/ACETAMINOPHEN/DIPHENHYDRAMINE”, “PSEUDOEPHEDRINE<br/> HCL/ACETAMINOPHEN/DOXYLAMINE SUCCINATE”, “PSEUDOEPHEDRINE<br/> HCL/DIPHENHYDRAMINE CITRATE”, “PSEUDOEPHEDRINE HCL/DIPHENHYDRAMINE HCL”,<br/> “RAMELTEON”, “SUVOREXANT”, “THEOPHYLLINE/EPHEDRINE/HYDROXYZINE”,<br/> “ZALEPLON”, “ZOLPIDEM TARTRATE”, “MECLIZINE HCL” } </p> |
|--|---------------------------------------------------------------------------------------------------------------------------------------------------------------------------------------------------------------------------------------------------------------------------------------------------------------------------------------------------------------------------------------------------------------------------------------------------------------------------------------------------------------------------------------------------------------------------------------------------------------------------------------------------------------------------------------------------------------------------------------------------------------------------------------------------------------------------------------------------------------------------------------------------------------------------------------------------------------------------------------------------------------------------------------------------------------------------------------------------------------------------------------------------------------------------------------------------------------------------------------------------------------------------------------------------------------------------------------------------------------------------------------------------------------------------------------------------------------------------------------------------------------------------------------------------------------------------------------------------------------------------------------------------------------------------------------------------------------------------------------------------------------------------------------------------------------------------------------------------------------------------------------------------------------------------------------------------------------------------------------------------------------------------------------------------------------------------------------------------------------------------------------------------------------------------------------------------------------------------------------------------------------------------------------------------------------------------------------------------------------------------------------------------------------------|

Abbreviations: HIV, human immunodeficiency virus. COPD, chronic obstructive pulmonary disease. NASIDs, non-steroidal anti-inflammatory drugs. CNS, central nervous system.

**Table 4. Baseline Characteristics Before and After Propensity Score Matching in the Pneumonia Cohort <sup>a</sup>**

| Variable                                                        | Before matching  |                | Standardized difference | After matching   |                | Standardized difference |
|-----------------------------------------------------------------|------------------|----------------|-------------------------|------------------|----------------|-------------------------|
|                                                                 | Fluoroquinolones | Azithromycin   |                         | Fluoroquinolones | Azithromycin   |                         |
| No. of patients                                                 | 493 988          | 331 432        |                         | 275 521          | 275 521        |                         |
| <b>Demographic characteristic</b>                               |                  |                |                         |                  |                |                         |
| Age, mean (SD), y                                               | 56.23 (17.32)    | 48.55 (17.76)  | -0.44                   | 51.44 (16.93)    | 51.69 (17.00)  | 0.01                    |
| Age categories, No. (%), y                                      |                  |                |                         |                  |                |                         |
| 18-24                                                           | 16 710 (3.4)     | 33 863 (10.2)  | 0.27                    | 15 748 (5.7)     | 14 228 (5.2)   | -0.02                   |
| 25-44                                                           | 111 117 (22.5)   | 108 340 (32.7) | 0.23                    | 83 467 (30.3)    | 82 206 (29.8)  | -0.01                   |
| 45-64                                                           | 222 424 (45.0)   | 132 957 (40.1) | -0.10                   | 120 455 (43.7)   | 123 594 (44.9) | 0.02                    |
| ≥ 65                                                            | 143 737 (29.1)   | 56 272 (17.0)  | -0.29                   | 55 851 (20.3)    | 55 493 (20.1)  | 0.00                    |
| Men, No. (%)                                                    | 249 236 (50.5)   | 157 558 (47.5) | -0.06                   | 133 903 (48.6)   | 134 269 (48.7) | 0.00                    |
| Region, No. (%)                                                 |                  |                |                         |                  |                |                         |
| Northeast                                                       | 68 208 (13.8)    | 57 926 (17.5)  | 0.10                    | 47 093 (17.1)    | 46 563 (16.9)  | -0.01                   |
| North Central                                                   | 137 393 (27.8)   | 95 265 (28.7)  | 0.02                    | 81 971 (29.8)    | 82 053 (29.8)  | 0.00                    |
| South                                                           | 199 324 (40.3)   | 86 025 (26.0)  | -0.31                   | 81 046 (29.4)    | 83 161 (30.2)  | 0.02                    |
| West                                                            | 82 497 (16.7)    | 87 638 (26.4)  | 0.24                    | 61 396 (22.3)    | 59 662 (21.7)  | -0.01                   |
| Unknown                                                         | 6 566 (1.3)      | 4 578 (1.4)    | 0.01                    | 4 015 (1.5)      | 4 082 (1.5)    | 0.00                    |
| <b>Psychiatric comorbidities, No. (%)</b>                       |                  |                |                         |                  |                |                         |
| Anxiety disorder                                                | 22 560 (4.6)     | 14 802 (4.5)   | 0.00                    | 12 103 (4.4)     | 11 872 (4.3)   | 0.00                    |
| Depression                                                      | 37 254 (7.5)     | 23 440 (7.1)   | -0.02                   | 19 531 (7.1)     | 19 034 (6.9)   | -0.01                   |
| Sleep disorder                                                  | 20 787 (4.2)     | 10 899 (3.3)   | -0.05                   | 9 703 (3.5)      | 9 676 (3.5)    | 0.00                    |
| Psychotic disorder                                              | 5 576 (1.1)      | 1 866 (0.6)    | -0.05                   | 1 806 (0.7)      | 1 682 (0.6)    | -0.01                   |
| Mania                                                           | 5 246 (1.1)      | 3 089 (0.9)    | -0.02                   | 2 657 (1.0)      | 2 564 (0.9)    | -0.01                   |
| Attention-deficit/hyperactivity disorder                        | 3 274 (0.7)      | 3 344 (1.0)    | 0.03                    | 2 284 (0.8)      | 2 194 (0.8)    | 0.00                    |
| Delirium                                                        | 7 995 (1.6)      | 1 801 (0.5)    | -0.11                   | 2 096 (0.8)      | 1 736 (0.6)    | -0.02                   |
| Dementia                                                        | 14 648 (3.0)     | 4 204 (1.3)    | -0.12                   | 4 492 (1.6)      | 4 130 (1.5)    | -0.01                   |
| Substance abuse                                                 | 36 662 (7.4)     | 18 815 (5.7)   | -0.07                   | 16 530 (6.0)     | 16 186 (5.9)   | 0.00                    |
| Personality disorder                                            | 552 (0.1)        | 333 (0.1)      | 0.00                    | 266 (0.1)        | 260 (0.1)      | 0.00                    |
| Adjustment reaction with disturbance other than depression mood | 5 661 (1.1)      | 5 000 (1.5)    | 0.04                    | 3 656 (1.3)      | 3 590 (1.3)    | 0.00                    |
| Other mental disorder                                           | 5 899 (1.2)      | 3 725 (1.1)    | -0.01                   | 3 028 (1.1)      | 2 977 (1.1)    | 0.00                    |
| <b>Neurological comorbidities, No. (%)</b>                      |                  |                |                         |                  |                |                         |
| Seizure/epilepsy                                                | 7 036 (1.4)      | 2 965 (0.9)    | -0.05                   | 2 697 (1.0)      | 2 594 (0.9)    | -0.01                   |
| Neuropathy/neuropathic pain                                     | 25 552 (5.2)     | 12 140 (3.7)   | -0.07                   | 11 348 (4.1)     | 11 104 (4.0)   | -0.01                   |
| Migraine                                                        | 8 421 (1.7)      | 6 245 (1.9)    | 0.02                    | 5 063 (1.8)      | 4 964 (1.8)    | 0.00                    |
| Parkinson disease                                               | 2 927 (0.6)      | 873 (0.3)      | -0.04                   | 906 (0.3)        | 867 (0.3)      | 0.00                    |
| Multiple sclerosis                                              | 1 646 (0.3)      | 803 (0.2)      | -0.02                   | 736 (0.3)        | 741 (0.3)      | 0.00                    |
| <b>Other comorbidities, No. (%)</b>                             |                  |                |                         |                  |                |                         |
| Congestive heart failure                                        | 43 284 (8.8)     | 11 585 (3.5)   | -0.22                   | 12 552 (4.6)     | 11 453 (4.2)   | -0.02                   |
| Ischemic heart disease                                          | 62 636 (12.7)    | 20 818 (6.3)   | -0.22                   | 21 533 (7.8)     | 20 463 (7.4)   | -0.02                   |
| Any stroke                                                      | 19 571 (4.0)     | 6 025 (1.8)    | -0.13                   | 6 332 (2.3)      | 5 916 (2.1)    | -0.01                   |
| Atrial fibrillation                                             | 31 454 (6.4)     | 10 391 (3.1)   | -0.16                   | 10 624 (3.9)     | 10 182 (3.7)   | -0.01                   |
| Autoimmune disorder                                             | 25 021 (5.1)     | 11 926 (3.6)   | -0.07                   | 10 973 (4.0)     | 10 927 (4.0)   | 0.00                    |
| Diabetes                                                        | 81 957 (16.6)    | 34 195 (10.3)  | -0.19                   | 33 149 (12.0)    | 32 909 (11.9)  | 0.00                    |
| Skin disorder                                                   | 74 291 (15.0)    | 43 983 (13.3)  | -0.05                   | 37 778 (13.7)    | 37 218 (13.5)  | -0.01                   |
| Renal dysfunction                                               | 40 950 (8.3)     | 11 292 (3.4)   | -0.21                   | 12 016 (4.4)     | 11 079 (4.0)   | -0.02                   |
| Liver disease                                                   | 15 956 (3.2)     | 5 624 (1.7)    | -0.10                   | 5 631 (2.0)      | 5 343 (1.9)    | -0.01                   |
| Asthma/COPD                                                     | 177 184 (35.9)   | 91 446 (27.6)  | -0.18                   | 81 428 (29.6)    | 80 907 (29.4)  | 0.00                    |
| CCI, mean (SD)                                                  | 0.68 (1.51)      | 0.31 (1.05)    | -0.28                   | 0.38 (1.14)      | 0.34 (1.13)    | -0.04                   |
| Frailty index, mean (SD)                                        | 0.15 (0.05)      | 0.14 (0.04)    | -0.22                   | 0.14 (0.04)      | 0.14 (0.04)    | 0.00                    |
| <b>Medication use</b>                                           |                  |                |                         |                  |                |                         |
| Opioid                                                          | 171 900 (34.8)   | 89 637 (27.0)  | -0.17                   | 80 621 (29.3)    | 80 738 (29.3)  | 0.00                    |
| Lithium                                                         | 1 268 (0.3)      | 746 (0.2)      | -0.02                   | 648 (0.2)        | 641 (0.2)      | 0.00                    |
| Antipsychotics                                                  | 14 335 (2.9)     | 6 083 (1.8)    | -0.07                   | 5 603 (2.0)      | 5 432 (2.0)    | 0.00                    |
| Antidepressant                                                  | 114 522 (23.2)   | 62 769 (18.9)  | -0.11                   | 55 432 (20.1)    | 55 238 (20.0)  | 0.00                    |
| NSAID                                                           | 71 621 (14.5)    | 45 961 (13.9)  | -0.02                   | 39 201 (14.2)    | 39 355 (14.3)  | 0.00                    |
| Benzodiazepine                                                  | 67 612 (13.7)    | 33 103 (10.0)  | -0.11                   | 30 314 (11.0)    | 29 932 (10.9)  | 0.00                    |
| Migraine product                                                | 7 065 (1.4)      | 5 491 (1.7)    | 0.02                    | 4 401 (1.6)      | 4 466 (1.6)    | 0.00                    |
| Antiparkinson agent                                             | 8 277 (1.7)      | 3 220 (1.0)    | -0.06                   | 3 141 (1.1)      | 3 093 (1.1)    | 0.00                    |
| Dementia medication                                             | 11 366 (2.3)     | 3 413 (1.0)    | -0.10                   | 3 526 (1.3)      | 3 396 (1.2)    | -0.01                   |
| Muscle relaxant                                                 | 40 868 (8.3)     | 22 246 (6.7)   | -0.06                   | 19 897 (7.2)     | 19 856 (7.2)   | 0.00                    |
| Anticonvulsant                                                  | 46 081 (9.3)     | 20 862 (6.3)   | -0.11                   | 19 354 (7.0)     | 19 004 (6.9)   | 0.00                    |
| CNS Stimulant                                                   | 4 612 (0.9)      | 2 713 (0.8)    | -0.01                   | 2 396 (0.9)      | 2 390 (0.9)    | 0.00                    |
| Other anxiolytic/hypnotic                                       | 42 750 (8.7)     | 20 856 (6.3)   | -0.09                   | 19 113 (6.9)     | 18 894 (6.9)   | 0.00                    |
| <b>Health services utilization, mean (SD)</b>                   |                  |                |                         |                  |                |                         |
| No. office visits                                               | 4.67 (4.98)      | 3.92 (4.10)    | -0.16                   | 4.11 (4.37)      | 4.05 (4.18)    | -0.01                   |
| No. psychotropic medications                                    | 3.13 (5.91)      | 2.23 (4.82)    | -0.17                   | 2.46 (5.11)      | 2.44 (5.06)    | 0.00                    |

|                                                               |               |               |       |               |               |       |
|---------------------------------------------------------------|---------------|---------------|-------|---------------|---------------|-------|
| No. unique psychotropic medications                           | 1.20 (1.68)   | 0.90 (1.43)   | -0.19 | 0.98 (1.49)   | 0.97 (1.48)   | -0.01 |
| No. total medications                                         | 15.37 (14.93) | 11.09 (11.97) | -0.32 | 12.19 (12.62) | 12.10 (12.55) | -0.01 |
| No. unique medications                                        | 7.45 (4.99)   | 5.79 (4.22)   | -0.36 | 6.22 (4.34)   | 6.18 (4.37)   | -0.01 |
| No. hospitalizations                                          | 0.38 (0.63)   | 0.13 (0.40)   | -0.47 | 0.17 (0.44)   | 0.16 (0.44)   | -0.02 |
| No. psychiatric hospitalizations                              | 0.01 (0.27)   | 0.00 (0.20)   | -0.04 | 0.00 (0.23)   | 0.00 (0.22)   | 0.00  |
| No. ED visit                                                  | 0.72 (1.18)   | 0.52 (0.98)   | -0.18 | 0.56 (1.08)   | 0.54 (0.98)   | -0.02 |
| No. psychiatrists and psychologists' visits                   | 0.19 (1.41)   | 0.18 (1.42)   | -0.01 | 0.18 (1.40)   | 0.17 (1.38)   | -0.01 |
| Any psychotherapy visits <30 d, n (%)                         | 11 796 (2.4)  | 9 009 (2.7)   | 0.02  | 7 107 (2.6)   | 7 003 (2.5)   | -0.01 |
| No. unique ICD-9 diagnoses at the 3 <sup>rd</sup> digit level | 4.52 (5.96)   | 2.62 (3.53)   | -0.39 | 2.96 (3.93)   | 2.80 (3.79)   | -0.04 |

Abbreviations: CCI, combined comorbidity index; COPD: chronic obstructive pulmonary disease; NSAID: nonsteroidal anti-inflammatory drug; CNS central nervous system.

a. Propensity score model also included year of cohort entry for adjustment

**Table 5. Baseline Characteristics Before and After Propensity Score Matching in the Urinary Tract Infection Cohort <sup>a</sup>**

| Variable                                                        | Before matching  |                | Standardized difference | After matching   |                | Standardized difference |
|-----------------------------------------------------------------|------------------|----------------|-------------------------|------------------|----------------|-------------------------|
|                                                                 | Fluoroquinolones | TMP-SMX        |                         | Fluoroquinolones | TMP-SMX        |                         |
| No. of patients                                                 | 2 357 232        | 1 106 268      |                         | 1 102 613        | 1 102 613      |                         |
| <b>Demographic characteristic</b>                               |                  |                |                         |                  |                |                         |
| Age, mean (SD), y                                               | 48.08 (17.55)    | 43.70 (17.51)  | -0.25                   | 43.66 (17.41)    | 43.76 (17.49)  | 0.01                    |
| Age categories, No. (%), y                                      |                  |                |                         |                  |                |                         |
| 18-24                                                           | 251 784 (10.7)   | 192 533 (17.4) | 0.19                    | 195 010 (17.7)   | 189 810 (17.2) | -0.01                   |
| 25-44                                                           | 760 523 (32.3)   | 397 414 (35.9) | 0.08                    | 395 123 (35.8)   | 396 915 (36.0) | 0.00                    |
| 45-64                                                           | 976 993 (41.4)   | 392 718 (35.5) | -0.12                   | 388 695 (35.3)   | 392 357 (35.6) | 0.01                    |
| ≥ 65                                                            | 367 932 (15.6)   | 123 603 (11.2) | -0.13                   | 123 785 (11.2)   | 123 531 (11.2) | 0.00                    |
| Men, No. (%)                                                    | 362 442 (15.4)   | 89 333 (8.1)   | -0.23                   | 92 621 (8.4)     | 89 254 (8.1)   | -0.01                   |
| Region, No. (%)                                                 |                  |                |                         |                  |                |                         |
| Northeast                                                       | 331 853 (14.1)   | 146 188 (13.2) | -0.03                   | 144 891 (13.1)   | 145 986 (13.2) | 0.00                    |
| North Central                                                   | 539 377 (22.9)   | 305 485 (27.6) | 0.11                    | 302 845 (27.5)   | 302 771 (27.5) | 0.00                    |
| South                                                           | 988 921 (42.0)   | 434 877 (39.3) | -0.05                   | 434 978 (39.4)   | 434 385 (39.4) | 0.00                    |
| West                                                            | 460 817 (19.5)   | 201 469 (18.2) | -0.03                   | 201 642 (18.3)   | 201 256 (18.3) | 0.00                    |
| Unknown                                                         | 36 264 (1.5)     | 18 249 (1.6)   | 0.01                    | 18 257 (1.7)     | 18 215 (1.7)   | 0.00                    |
| <b>Psychiatric comorbidities, No. (%)</b>                       |                  |                |                         |                  |                |                         |
| Anxiety disorder                                                | 123 108 (5.2)    | 58 446 (5.3)   | 0.00                    | 57 931 (5.3)     | 58 236 (5.3)   | 0.00                    |
| Depression                                                      | 190 307 (8.1)    | 89 200 (8.1)   | 0.00                    | 88 256 (8.0)     | 88 806 (8.1)   | 0.00                    |
| Sleep disorder                                                  | 76 354 (3.2)     | 30 986 (2.8)   | -0.02                   | 30 924 (2.8)     | 30 920 (2.8)   | 0.00                    |
| Psychotic disorder                                              | 14 638 (0.6)     | 5 186 (0.5)    | -0.01                   | 5 314 (0.5)      | 5 161 (0.5)    | 0.00                    |
| Mania                                                           | 23 061 (1.0)     | 11 121 (1.0)   | 0.00                    | 11 079 (1.0)     | 11 072 (1.0)   | 0.00                    |
| Attention-deficit/hyperactivity disorder                        | 24 197 (1.0)     | 12 879 (1.2)   | 0.02                    | 12 802 (1.2)     | 12 845 (1.2)   | 0.00                    |
| Delirium                                                        | 15 282 (0.6)     | 4 350 (0.4)    | -0.03                   | 4 554 (0.4)      | 4 344 (0.4)    | 0.00                    |
| Dementia                                                        | 36 271 (1.5)     | 10 600 (1.0)   | -0.05                   | 10 892 (1.0)     | 10 583 (1.0)   | 0.00                    |
| Substance abuse                                                 | 68 320 (2.9)     | 30 178 (2.7)   | -0.01                   | 30 116 (2.7)     | 30 050 (2.7)   | 0.00                    |
| Personality disorder                                            | 2 733 (0.1)      | 1 338 (0.1)    | 0.00                    | 1 363 (0.1)      | 1 328 (0.1)    | 0.00                    |
| Adjustment reaction with disturbance other than depression mood | 38 479 (1.6)     | 18 838 (1.7)   | 0.01                    | 18 664 (1.7)     | 18 763 (1.7)   | 0.00                    |
| Other mental disorder                                           | 29 781 (1.3)     | 14 147 (1.3)   | 0.00                    | 14 027 (1.3)     | 14 066 (1.3)   | 0.00                    |
| <b>Neurological comorbidities, No. (%)</b>                      |                  |                |                         |                  |                |                         |
| Seizure/epilepsy                                                | 19 965 (0.8)     | 8 439 (0.8)    | 0.00                    | 8 423 (0.8)      | 8 383 (0.8)    | 0.00                    |
| Neuropathy/neuropathic pain                                     | 91 540 (3.9)     | 34 943 (3.2)   | -0.04                   | 34 793 (3.2)     | 34 891 (3.2)   | 0.00                    |
| Migraine                                                        | 64 276 (2.7)     | 30 559 (2.8)   | 0.01                    | 30 016 (2.7)     | 30 486 (2.8)   | 0.01                    |
| Parkinson disease                                               | 7 674 (0.3)      | 2 269 (0.2)    | -0.02                   | 2 348 (0.2)      | 2 267 (0.2)    | 0.00                    |
| Multiple sclerosis                                              | 12 173 (0.5)     | 4 595 (0.4)    | -0.01                   | 4 569 (0.4)      | 4 587 (0.4)    | 0.00                    |
| <b>Other comorbidities, No. (%)</b>                             |                  |                |                         |                  |                |                         |
| Congestive heart failure                                        | 40 418 (1.7)     | 10 931 (1.0)   | -0.06                   | 11 554 (1.0)     | 10 921 (1.0)   | 0.00                    |
| Ischemic heart disease                                          | 106 752 (4.5)    | 31 508 (2.8)   | -0.09                   | 32 282 (2.9)     | 31 478 (2.9)   | 0.00                    |
| Any stroke                                                      | 44 968 (1.9)     | 13 117 (1.2)   | -0.06                   | 13 534 (1.2)     | 13 104 (1.2)   | 0.00                    |
| Atrial fibrillation                                             | 46 953 (2.0)     | 14 437 (1.3)   | -0.05                   | 14 788 (1.3)     | 14 423 (1.3)   | 0.00                    |
| Autoimmune disorder                                             | 96 293 (4.1)     | 34 251 (3.1)   | -0.05                   | 33 987 (3.1)     | 34 204 (3.1)   | 0.00                    |
| Diabetes                                                        | 242 549 (10.3)   | 84 116 (7.6)   | -0.09                   | 83 932 (7.6)     | 84 031 (7.6)   | 0.00                    |
| Skin disorder                                                   | 341 541 (14.5)   | 148 678 (13.4) | -0.03                   | 147 370 (13.4)   | 148 296 (13.4) | 0.00                    |
| Renal dysfunction                                               | 91 175 (3.9)     | 21 482 (1.9)   | -0.12                   | 22 927 (2.1)     | 21 465 (1.9)   | -0.01                   |
| Liver disease                                                   | 46 264 (2.0)     | 14 276 (1.3)   | -0.05                   | 14 419 (1.3)     | 14 253 (1.3)   | 0.00                    |
| Asthma/COPD                                                     | 339 791 (14.4)   | 140 847 (12.7) | -0.05                   | 139 285 (12.6)   | 140 578 (12.7) | 0.00                    |
| CCI, mean (SD)                                                  | 0.15 (0.90)      | 0.09 (0.73)    | -0.07                   | 0.10 (0.73)      | 0.09 (0.73)    | -0.01                   |
| Frailty index, mean (SD)                                        | 0.13 (0.04)      | 0.12 (0.03)    | -0.28                   | 0.12 (0.03)      | 0.12 (0.03)    | 0.00                    |
| <b>Medication use</b>                                           |                  |                |                         |                  |                |                         |
| Opioid                                                          | 615 817 (26.1)   | 244 779 (22.1) | -0.09                   | 243 198 (22.1)   | 244 455 (22.2) | 0.00                    |
| Lithium                                                         | 5 588 (0.2)      | 2 678 (0.2)    | 0.00                    | 2 649 (0.2)      | 2 666 (0.2)    | 0.00                    |
| Antipsychotics                                                  | 45 648 (1.9)     | 18 854 (1.7)   | -0.02                   | 18 838 (1.7)     | 18 792 (1.7)   | 0.00                    |
| Antidepressant                                                  | 518 166 (22.0)   | 231 052 (20.9) | -0.03                   | 228 466 (20.7)   | 230 432 (20.9) | 0.00                    |
| NSAID                                                           | 368 134 (15.6)   | 165 009 (14.9) | -0.02                   | 163 022 (14.8)   | 164 539 (14.9) | 0.00                    |
| Benzodiazepine                                                  | 284 039 (12.0)   | 116 980 (10.6) | -0.04                   | 116 039 (10.5)   | 116 818 (10.6) | 0.00                    |
| Migraine product                                                | 62 795 (2.7)     | 29 311 (2.6)   | -0.01                   | 28 652 (2.6)     | 29 254 (2.7)   | 0.01                    |
| Antiparkinson agent                                             | 23 305 (1.0)     | 8 767 (0.8)    | -0.02                   | 8 628 (0.8)      | 8 748 (0.8)    | 0.00                    |
| Dementia medication                                             | 28 357 (1.2)     | 8 340 (0.8)    | -0.04                   | 8 418 (0.8)      | 8 332 (0.8)    | 0.00                    |
| Muscle relaxant                                                 | 195 738 (8.3)    | 85 939 (7.8)   | -0.02                   | 84 960 (7.7)     | 85 729 (7.8)   | 0.00                    |
| Anticonvulsant                                                  | 165 562 (7.0)    | 67 168 (6.1)   | -0.04                   | 66 726 (6.1)     | 66 997 (6.1)   | 0.00                    |
| CNS Stimulant                                                   | 29 576 (1.3)     | 13 287 (1.2)   | -0.01                   | 13 105 (1.2)     | 13 272 (1.2)   | 0.00                    |
| Other anxiolytic/hypnotic                                       | 185 435 (7.9)    | 74 700 (6.8)   | -0.04                   | 73 809 (6.7)     | 74 585 (6.8)   | 0.00                    |
| <b>Health services utilization, mean (SD)</b>                   |                  |                |                         |                  |                |                         |
| No. office visits                                               | 4.18 (4.17)      | 3.83 (3.80)    | -0.09                   | 3.83 (3.78)      | 3.83 (3.80)    | 0.00                    |
| No. psychotropic medications                                    | 2.46 (4.93)      | 2.17 (4.62)    | -0.06                   | 2.16 (4.61)      | 2.17 (4.62)    | 0.00                    |
| No. unique psychotropic medications                             | 0.99 (1.50)      | 0.88 (1.43)    | -0.08                   | 0.88 (1.42)      | 0.88 (1.43)    | 0.00                    |
| No. total medications                                           | 11.35 (11.75)    | 9.92 (10.57)   | -0.13                   | 9.90 (10.58)     | 9.93 (10.57)   | 0.00                    |

|                                                                  |              |              |       |              |              |       |
|------------------------------------------------------------------|--------------|--------------|-------|--------------|--------------|-------|
| No. unique medications                                           | 5.68 (4.10)  | 5.10 (3.76)  | -0.15 | 5.09 (3.73)  | 5.11 (3.76)  | 0.01  |
| No. hospitalizations                                             | 0.10 (0.37)  | 0.06 (0.29)  | -0.12 | 0.07 (0.28)  | 0.06 (0.29)  | -0.04 |
| No. psychiatric hospitalizations                                 | 0.00 (0.23)  | 0.00 (0.26)  | 0.00  | 0.00 (0.27)  | 0.00 (0.24)  | 0.00  |
| No. ED visit                                                     | 0.39 (0.90)  | 0.32 (0.83)  | -0.08 | 0.33 (0.78)  | 0.32 (0.83)  | -0.01 |
| No. psychiatrists and<br>psychologists' visits                   | 0.20 (1.49)  | 0.19 (1.43)  | -0.01 | 0.18 (1.38)  | 0.19 (1.43)  | 0.01  |
| Any psychotherapy visits <30 d                                   | 73 524 (3.1) | 34 052 (3.1) | 0.00  | 33 725 (3.1) | 33 957 (3.1) | 0.00  |
| No. unique ICD-9 diagnoses at<br>the 3 <sup>rd</sup> digit level | 0.64 (2.66)  | 0.47 (2.04)  | -0.07 | 0.48 (2.05)  | 0.47 (2.04)  | 0.00  |

Abbreviations: TMP-SMX, trimethoprim and sulfamethoxazole; CCI, combined comorbidity index; COPD: chronic obstructive pulmonary disease; NSAID: nonsteroidal anti-inflammatory drug; CNS central nervous system.

a. Propensity score model also included year of cohort entry for adjustment

**Table 6. Duration and Generic Distribution of Index Drug dispensing in PS-matched Population**

| Variable                                                     | Pneumonia cohort |                 | Urinary tract infection cohort |                   |
|--------------------------------------------------------------|------------------|-----------------|--------------------------------|-------------------|
|                                                              | Fluoroquinolone  | Azithromycin    | Fluoroquinolone                | TMP-SMX           |
| <b>Days' supply of index dispensing, median (Days) [IQR]</b> | 10 [7, 10]       | 5 [5, 5]        | 7 [5, 8]                       | 7 [3, 10]         |
| <b>Generic names, n (%)</b>                                  |                  |                 |                                |                   |
| Azithromycin                                                 | 0 (0.0)          | 275 513 (100.0) | 3 (0.0)                        | 3 (0.0)           |
| Ciprofloxacin                                                | 13 333 (4.8)     | 0 (0.0)         | 951 830 (86.3)                 | 0 (0.0)           |
| Levofloxacin                                                 | 201 284 (73.1)   | 0 (0.0)         | 142 624 (12.9)                 | 0 (0.0)           |
| Moxifloxacin                                                 | 56 977 (20.7)    | 0 (0.0)         | 3 659 (0.3)                    | 0 (0.0)           |
| Other fluoroquinolones*                                      | 3 912 (1.4)      | 0 (0.0)         | 4 408 (0.4)                    | 0 (0.0)           |
| TMP-SMX                                                      | 0 (0.0)          | 0 (0.0)         | 0 (0.0)                        | 1 102 569 (100.0) |

Abbreviations: IQR, interquartile range (25<sup>th</sup> – 75<sup>th</sup> percentile), TMP-SMX, trimethoprim and sulfamethoxazole.

\* Other fluoroquinolones included: gatifloxacin, gemifloxacin, moxifloxacin, norfloxacin, ofloxacin, besifloxacin.



**Table 7. Censoring Reasons in PS-matched Population, main analysis, 60-day follow-up**

|                                             | Pneumonia cohort |                | Urinary tract infection cohort |                  |
|---------------------------------------------|------------------|----------------|--------------------------------|------------------|
|                                             | Fluoroquinolone  | Azithromycin   | Fluoroquinolone                | TMP-SMX          |
| No. of patients                             | 275 521          | 275 521        | 1 102 613                      | 1 102 613        |
| Follow-up time (days), median [IQR]         | 60 [60, 60]      | 60 [60, 60]    | 60 [60, 60]                    | 60 [60, 60]      |
| Reasons, No. (%)                            |                  |                |                                |                  |
| Outcome                                     | 91 (0.0)         | 90 (0.0)       | 491 (0.0)                      | 475 (0.0)        |
| Death                                       | 347 (0.1)        | 255 (0.1)      | 244 (0.0)                      | 278 (0.0)        |
| Maximum follow-up time (60 days)            | 254 270 (92.3)   | 254 914 (92.5) | 1 025 405 (93.0)               | 1 025 242 (93.0) |
| Specified date reached (September 30, 2015) | 2 726 (1.0)      | 2 609 (0.9)    | 13 817 (1.3)                   | 13 562 (1.2)     |
| End of patient enrollment                   | 15 351 (5.6)     | 15 440 (5.6)   | 57 557 (5.2)                   | 57 493 (5.2)     |
| Nursing home admission                      | 2 736 (1.0)      | 2 213 (0.8)    | 5 099 (0.5)                    | 5 563 (0.5)      |

Abbreviations: IQR, interquartile range (25<sup>th</sup> – 75<sup>th</sup> percentile), TMP-SMX, trimethoprim and sulfamethoxazole.

**Figure. Cumulative Incidence for Suicidality – Primary Analysis**

**Panel A: Fluoroquinolones vs Azithromycin**

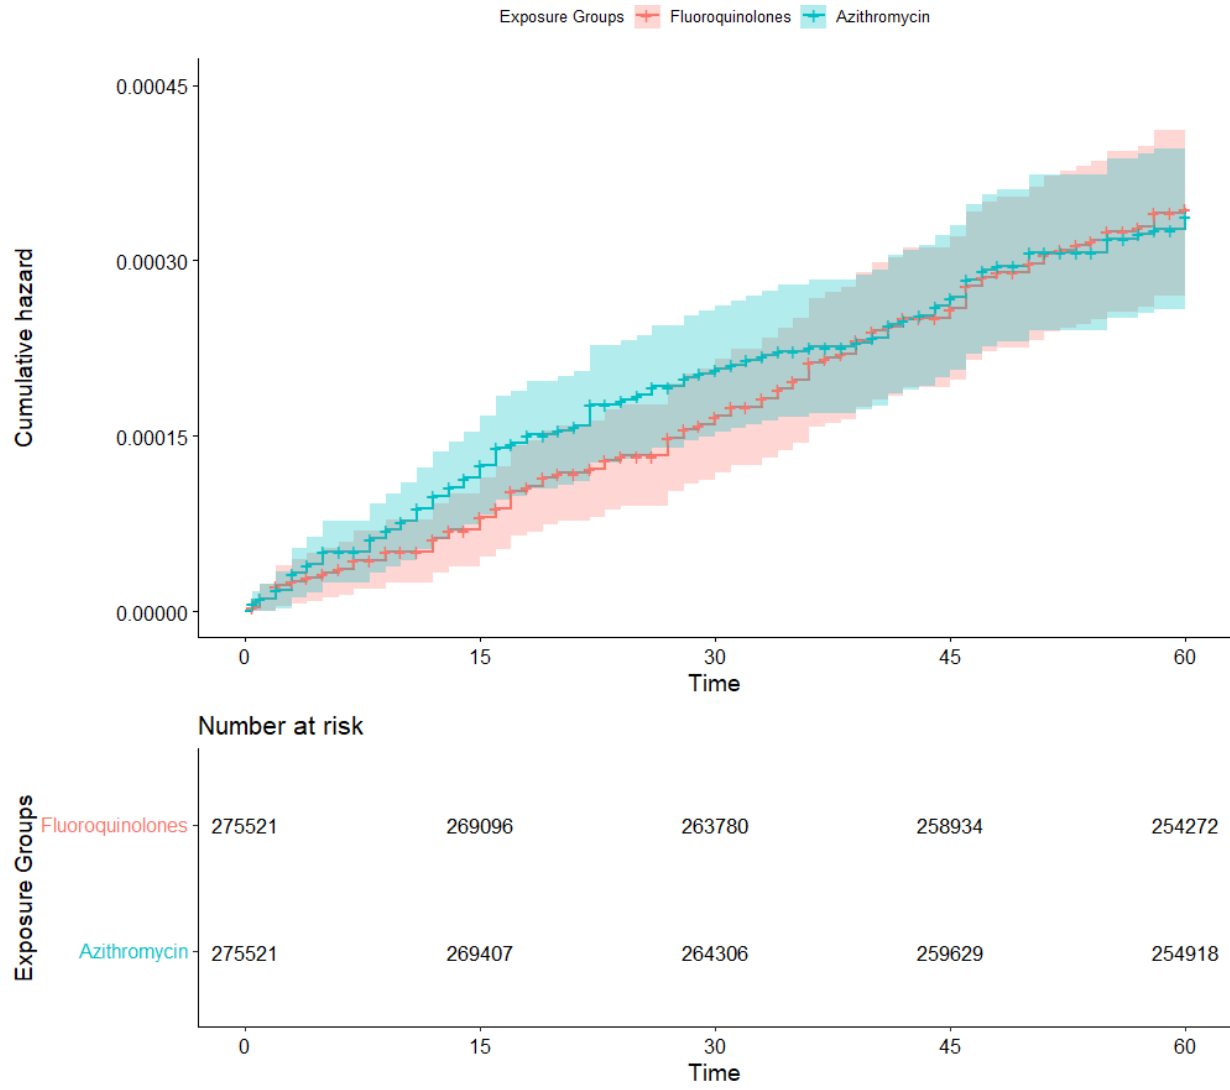

## Panel B: Fluoroquinolones vs Azithromycin

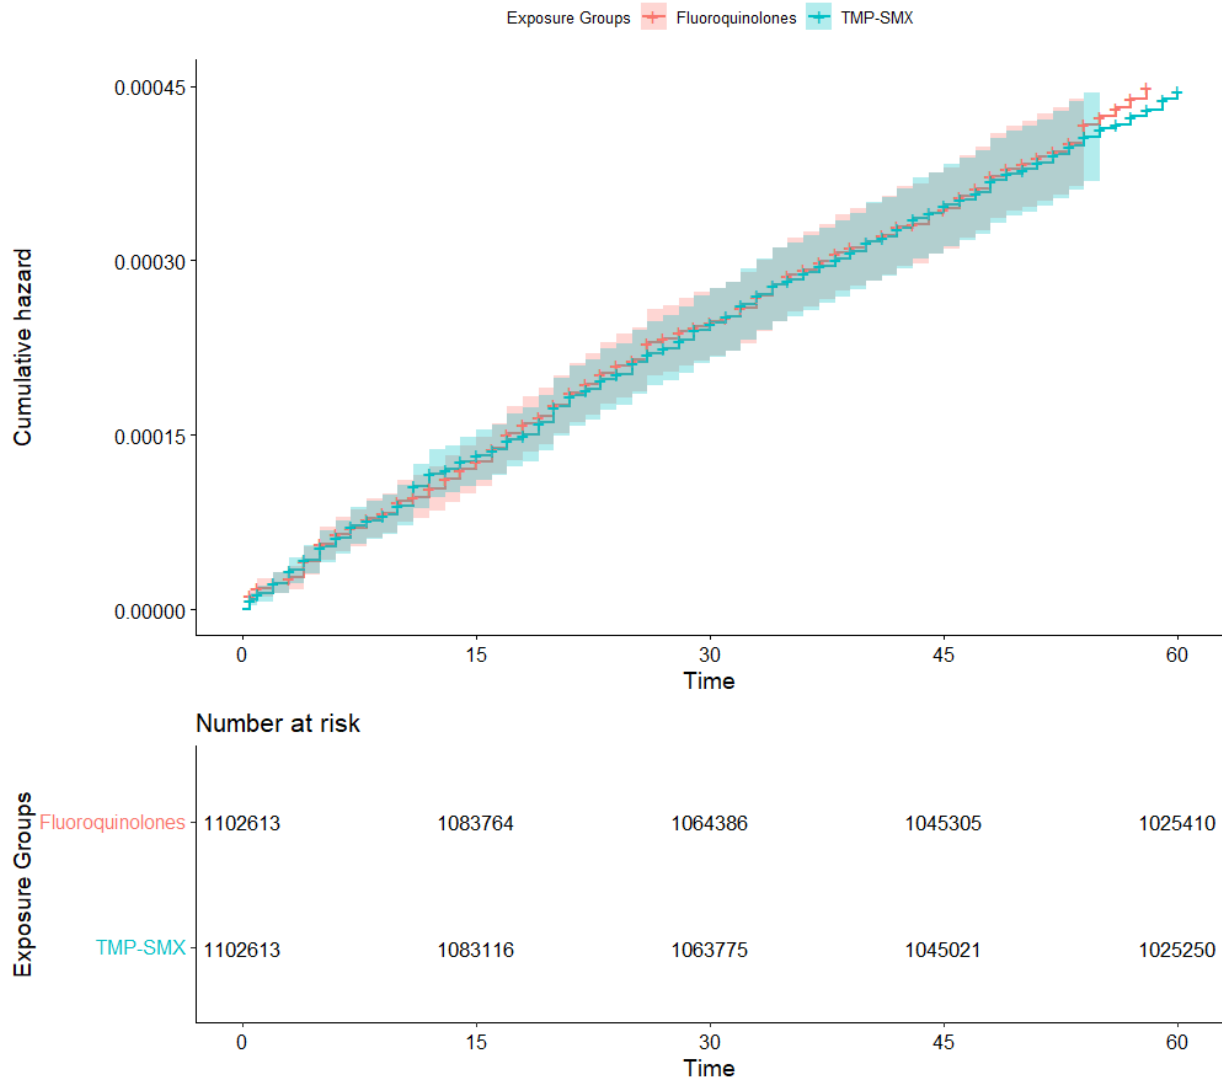

Abbreviations: PS, propensity score; TMP-SMX, trimethoprim and sulfamethoxazole.

**Table 8. Risk of Hospitalizations for Suicidal Ideation or Intentional Self-Harm Before Propensity Score Matching following 60 Days after Antibiotic Initiation**

| Analyses                                                                  | Pneumonia cohort    |                   | Urinary tract infection cohort |                   |
|---------------------------------------------------------------------------|---------------------|-------------------|--------------------------------|-------------------|
|                                                                           | Fluoroquinolone     | Azithromycin      | Fluoroquinolone                | TMP-SMX           |
| No. of patients                                                           | 493 392             | 330 998           | 2 354 835                      | 1 105 164         |
| Intentional self-harm hospitalization events, N (%) (Risk/1 000 patients) | 175 (0.04) (0.35)   | 111 (0.03) (0.34) | 992 (0.04) (0.42)              | 475 (0.04) (0.43) |
| Hazard ratio (95% CI)                                                     | 1.06 (0.84 to 1.35) | Reference         | 0.98 (0.88 to 1.09)            | Reference         |

Abbreviations: PS, propensity score; TMP-SMX, trimethoprim and sulfamethoxazole.

**Table 9. Risk of Hospitalizations for Suicidal Ideation or Intentional Self-Harm Before and After Propensity Score Matching following 14 Days after Antibiotic Initiation**

| Analyses                                               | Before PS-matching   |                      | After PS-matching    |                      |
|--------------------------------------------------------|----------------------|----------------------|----------------------|----------------------|
|                                                        | Fluoroquinolone      | Azithromycin         | Fluoroquinolone      | Azithromycin         |
| <b>Pneumonia cohort</b>                                |                      |                      |                      |                      |
| Antibiotic                                             | Fluoroquinolone      | Azithromycin         | Fluoroquinolone      | Azithromycin         |
| No. of patients                                        | 493 392              | 330 998              | 275 521              | 275 521              |
| Intentional self-harm                                  |                      |                      |                      |                      |
| hospitalization events, N (%)<br>(Risk/1 000 patients) | 50 (0.01)<br>(0.10)  | 38 (0.01)<br>(0.11)  | 19 (0.01)<br>(0.07)  | 31 (0.01)<br>(0.11)  |
| Hazard ratio (95% CI)                                  | 0.89 (0.58 to 1.35)  | 1 [Reference]        | 0.61 (0.35 to 1.09)  | 1 [Reference]        |
| <b>Urinary tract infection cohort</b>                  |                      |                      |                      |                      |
| Antibiotic                                             | Fluoroquinolone      | TMP-SMX              | Fluoroquinolone      | TMP-SMX              |
| No. of patients                                        | 2 354 835            | 1 105 164            | 1 102 613            | 1 102 613            |
| Intentional self-harm                                  |                      |                      |                      |                      |
| hospitalization events, N (%)<br>(Risk/1 000 patients) | 298 (0.01)<br>(0.13) | 139 (0.01)<br>(0.13) | 132 (0.01)<br>(0.12) | 139 (0.01)<br>(0.13) |
| Hazard ratio (95% CI)                                  | 1.01 (0.82 to 1.23)  | 1 [Reference]        | 0.95 (0.75 to 1.20)  | 1 [Reference]        |

Abbreviations: PS, propensity score; TMP-SMX, trimethoprim and sulfamethoxazole.

**Table 10. Risk of Hospitalizations for Suicidal Ideation or Intentional Self-Harm Before and After Propensity Score Matching following 30 Days after Antibiotic Initiation**

| Analyses                                                                  | Before PS-matching  |                   | After PS-matching   |                   |
|---------------------------------------------------------------------------|---------------------|-------------------|---------------------|-------------------|
|                                                                           | Fluoroquinolone     | Azithromycin      | Fluoroquinolone     | Azithromycin      |
| <b>Pneumonia cohort</b>                                                   |                     |                   |                     |                   |
| Antibiotic                                                                | Fluoroquinolone     | Azithromycin      | Fluoroquinolone     | Azithromycin      |
| No. of patients                                                           | 493 392             | 330 998           | 275 521             | 275 521           |
| Intentional self-harm hospitalization events, N (%) (Risk/1 000 patients) | 92 (0.02) (0.19)    | 68 (0.0) (0.21)   | 45 (0.02) (0.16)    | 56 (0.02) (0.20)  |
| Hazard ratio (95% CI)                                                     | 0.91 (0.67 to 1.25) | 1 [Reference]     | 0.80 (0.54 to 1.19) | 1 [Reference]     |
| <b>Urinary tract infection cohort</b>                                     |                     |                   |                     |                   |
| Antibiotic                                                                | Fluoroquinolone     | TMP-SMX           | Fluoroquinolone     | TMP-SMX           |
| No. of patients                                                           | 2 354 835           | 1 105 164         | 1 102 613           | 102 613           |
| Intentional self-harm hospitalization events, N (%) (Risk/1 000 patients) | 577 (0.03) (0.25)   | 267 (0.02) (0.24) | 268 (0.02) (0.24)   | 267 (0.02) (0.24) |
| Hazard ratio (95% CI)                                                     | 1.01 (0.88 to 1.17) | 1 [Reference]     | 1.00 (0.85 to 1.19) | 1 [Reference]     |

Abbreviations: PS, propensity score; TMP-SMX, trimethoprim and sulfamethoxazole.

**Table 11. Risk of Hospitalizations for Suicidal Ideation or Intentional Self-Harm Before and After Propensity Score Matching following 90 Days after Antibiotic Initiation**

| Analyses                                                                  | Before PS-matching  |                   | After PS-matching   |                   |
|---------------------------------------------------------------------------|---------------------|-------------------|---------------------|-------------------|
|                                                                           | Fluoroquinolone     | Azithromycin      | Fluoroquinolone     | Azithromycin      |
| <b>Pneumonia cohort</b>                                                   |                     |                   |                     |                   |
| Antibiotic                                                                | Fluoroquinolone     | Azithromycin      | Fluoroquinolone     | Azithromycin      |
| No. of patients                                                           | 493 392             | 330 998           | 275 521             | 275 521           |
| Intentional self-harm hospitalization events, N (%) (Risk/1 000 patients) | 250 (0.05) (0.51)   | 162 (0.05) (0.49) | 135 (0.05) (0.49)   | 126 (0.05) (0.46) |
| Hazard ratio (95% CI)                                                     | 1.04 (0.86 to 1.27) | 1 [Reference]     | 1.07 (0.84 to 1.37) | 1 [Reference]     |
| <b>Urinary tract infection cohort</b>                                     |                     |                   |                     |                   |
| Antibiotic                                                                | Fluoroquinolone     | TMP-SMX           | Fluoroquinolone     | TMP-SMX           |
| No. of patients                                                           | 2 354 835           | 1 105 164         | 1 102 613           | 1 102 613         |
| Intentional self-harm hospitalization events, N (%) (Risk/1 000 patients) | 1 347 (0.06) (0.57) | 669 (0.06) (0.61) | 671 (0.06) (0.61)   | 668 (0.06) (0.61) |
| Hazard ratio (95% CI)                                                     | 0.95 (0.86 to 1.04) | 1 [Reference]     | 1.00 (0.90 to 1.12) | 1 [Reference]     |

Abbreviations: PS, propensity score; TMP-SMX, trimethoprim and sulfamethoxazole.

**Table 12. Risk of Hospitalizations for Suicidal Ideation or Intentional Self-Harm Before and After Propensity Score Matching following 60 Days after Antibiotic Initiation, including Patients with Cancer, HIV, or History of suicidality**

| Analyses                                                                  | Before PS-matching  |                   | After PS-matching*  |                   |
|---------------------------------------------------------------------------|---------------------|-------------------|---------------------|-------------------|
| <b>Pneumonia cohort</b>                                                   |                     |                   |                     |                   |
| Antibiotic                                                                | Fluoroquinolone     | Azithromycin      | Fluoroquinolone     | Azithromycin      |
| No. of patients                                                           | 568 846             | 358 318           | 301 897             | 301 897           |
| Intentional self-harm hospitalization events, N (%) (Risk/1 000 patients) | 205 (0.04) (0.36)   | 117 (0.03) (0.33) | 95 (0.03) (0.31)    | 92 (0.03) (0.30)  |
| Hazard ratio (95% CI)                                                     | 1.11 (0.89 to 1.39) | 1 [Reference]     | 1.03 (0.78 to 1.38) | 1 [Reference]     |
| <b>Urinary tract infection cohort</b>                                     |                     |                   |                     |                   |
| Antibiotic                                                                | Fluoroquinolone     | TMP-SMX           | Fluoroquinolone     | TMP-SMX           |
| No. of patients                                                           | 2 809 564           | 1 282 097         | 1 279 894           | 1 279 894         |
| Intentional self-harm hospitalization events, N (%) (Risk/1 000 patients) | 1 219 (0.04) (0.43) | 590 (0.05) (0.46) | 569 (0.04) (0.44)   | 589 (0.05) (0.46) |
| Hazard ratio (95% CI)                                                     | 0.94 (0.85 to 1.04) | 1 [Reference]     | 0.97 (0.86 to 1.08) | 1 [Reference]     |

Abbreviations: PS, propensity score; TMP-SMX, trimethoprim and sulfamethoxazole. HIV, human immunodeficiency virus.

\*Adjustment included cancer, HIV, and history of suicidality, in addition to all covariates listed in Table 3



**Table 13. Risk of Hospitalizations for Suicidal Ideation or Intentional Self-Harm Before and After Propensity Score Matching following 60 Days after Antibiotic Initiation with Restricted Outcome Definition\***

| Analyses                                                                  | Before PS-matching  |                   | After PS-matching   |                   |
|---------------------------------------------------------------------------|---------------------|-------------------|---------------------|-------------------|
|                                                                           | Fluoroquinolone     | Azithromycin      | Fluoroquinolone     | Azithromycin      |
| <b>Pneumonia cohort</b>                                                   |                     |                   |                     |                   |
| Antibiotic                                                                | Fluoroquinolone     | Azithromycin      | Fluoroquinolone     | Azithromycin      |
| No. of patients                                                           | 493 392             | 330 998           | 275 521             | 275 521           |
| Intentional self-harm hospitalization events, N (%) (Risk/1 000 patients) | 98 (0.02) (0.20)    | 71 (0.02) (0.21)  | 56 (0.02) (0.20)    | 52 (0.02) (0.19)  |
| Hazard ratio (95% CI)                                                     | 0.93 (0.69 to 1.26) | 1 [Reference]     | 1.08 (0.74 to 1.57) | 1 [Reference]     |
| <b>Urinary tract infection cohort</b>                                     |                     |                   |                     |                   |
| Antibiotic                                                                | Fluoroquinolone     | TMP-SMX           | Fluoroquinolone     | TMP-SMX           |
| No. of patients                                                           | 2 354 835           | 1 105 164         | 1 102 613           | 1 102 613         |
| Intentional self-harm hospitalization events, N (%) (Risk/1 000 patients) | 632 (0.03) (0.27)   | 314 (0.03) (0.28) | 307 (0.03) (0.28)   | 314 (0.03) (0.28) |
| Hazard ratio (95% CI)                                                     | 0.94 (0.83 to 1.08) | 1 [Reference]     | 0.98 (0.84 to 1.14) | 1 [Reference]     |

Abbreviations: PS, propensity score; TMP-SMX, trimethoprim and sulfamethoxazole. HIV, human immunodeficiency virus.

\*Restricted outcome definition: primary discharge diagnosis for hospitalizations and emergency room visit diagnosis in any position

**Table 14. Incidence Rates and Hazard Ratios of Subgroup Analyses after Propensity Score Matching following 60 Days after Antibiotic Initiation**

| Subgroup Analyses                                         | Pneumonia cohort    |              | UTI cohort          |               |
|-----------------------------------------------------------|---------------------|--------------|---------------------|---------------|
|                                                           | Fluoroquinolone     | Azithromycin | Fluoroquinolone     | TMP-SMX       |
| <b>by gender, male</b>                                    |                     |              |                     |               |
| No. of patients                                           | 133 748             | 133 748      | 89 251              | 89 251        |
| Hospitalized self-harm events,<br>N (%)                   | 41<br>(0.03)        | 44<br>(0.03) | 28 (0.03)           | 40 (0.04)     |
| Hazard ratio (95% CI)                                     | 0.93 (0.61 to 1.43) | Ref.         | 0.70 (0.43 to 1.13) | Ref.          |
| <b>by gender, female</b>                                  |                     |              |                     |               |
| No. of patients                                           | 141 662             | 141 662      | 1 013 274           | 1 013 274     |
| Hospitalized self-harm events,<br>N (%)                   | 49<br>(0.03)        | 43<br>(0.03) | 451<br>(0.04)       | 431<br>(0.04) |
| Hazard ratio (95% CI)                                     | 1.14 (0.76 to 1.72) | Ref.         | 1.05 (0.92 to 1.19) | Ref.          |
| <b>by age, 18-24 y</b>                                    |                     |              |                     |               |
| No. of patients                                           | 14 932              | 14 932       | 189 300             | 189 300       |
| Hospitalized self-harm events,<br>N (%)                   | 14<br>(0.09)        | 15<br>(0.10) | 162<br>(0.09)       | 171<br>(0.09) |
| Hazard ratio (95% CI)                                     | 0.94 (0.45 to 1.94) | Ref.         | 0.95 (0.76 to 1.17) | Ref.          |
| <b>by age, 25-44 y</b>                                    |                     |              |                     |               |
| No. of patients                                           | 82 876              | 82 876       | 396 966             | 396 966       |
| Hospitalized self-harm events,<br>N (%)                   | 29<br>(0.03)        | 36<br>(0.04) | 170<br>(0.04)       | 171<br>(0.04) |
| Hazard ratio (95% CI)                                     | 0.80 (0.49 to 1.31) | Ref.         | 0.99 (0.80 to 1.23) | Ref.          |
| <b>by age, 45-64 y</b>                                    |                     |              |                     |               |
| No. of patients                                           | 121 551             | 121 551      | 392 358             | 392 358       |
| Hospitalized self-harm events,<br>N (%)                   | 32<br>(0.03)        | 31<br>(0.03) | 108<br>(0.03)       | 115<br>(0.03) |
| Hazard ratio (95% CI)                                     | 1.03 (0.63 to 1.69) | Ref.         | 0.94 (0.72 to 1.22) | Ref.          |
| <b>by age, ≥ 65 y</b>                                     |                     |              |                     |               |
| No. of patients                                           | 56 014              | 56 014       | 123 532             | 123 532       |
| Hospitalized self-harm events,<br>N (%)                   | 8<br>(0.01)         | 6<br>(0.01)  | 28<br>(0.02)        | 18<br>(0.01)  |
| Hazard ratio (95% CI)                                     | 1.35 (0.47 to 3.88) | Ref.         | 1.55 (0.86 to 2.81) | Ref.          |
| <b>by baseline history of mental illness, has history</b> |                     |              |                     |               |
| No. of patients                                           | 113 110             | 113 110      | 433 477             | 433 477       |
| Hospitalized self-harm events,<br>N (%)                   | 75<br>(0.07)        | 85<br>(0.08) | 381<br>(0.09)       | 406<br>(0.09) |
| Hazard ratio (95% CI)                                     | 0.89 (0.65 to 1.21) | Ref.         | 0.94 (0.82 to 1.08) | Ref.          |
| <b>by baseline history of mental illness, no history</b>  |                     |              |                     |               |
| No. of patients                                           | 162 536             | 162 536      | 668 537             | 668 537       |
| Hospitalized self-harm events,<br>N (%)                   | 9<br>(0.00)         | 10<br>(0.00) | 73<br>(0.01)        | 67<br>(0.01)  |
| Hazard ratio (95% CI)                                     | 0.90 (0.37 to 2.22) | Ref.         | 1.09 (0.78 to 1.52) | Ref.          |

Abbreviations: TMP-SMX, trimethoprim and sulfamethoxazole
